1 **The metabolic response of *Pseudomonas taiwanensis* to NADH dehydrogenase**  
2 **deficiency**

3 Salome C. Nies<sup>1</sup>, Robert Dinger<sup>2</sup>, Yan Chen<sup>3</sup>, Gossa G. Wordofa<sup>4</sup>, Mette Kristensen<sup>4</sup>,  
4 Konstantin Schneider<sup>4</sup>, Jochen Büchs<sup>2</sup>, Christopher J. Petzold<sup>3,5</sup>, Jay D.  
5 Keasling<sup>3,4,5,6,7,8</sup>, Lars M. Blank<sup>1\*</sup>, Birgitta E. Ebert<sup>1§</sup>

6  
7 <sup>1</sup>iAMB-Institute of Applied Microbiology, ABBt-Aachen Biology and Biotechnology,  
8 RWTH Aachen University, DE

9 <sup>2</sup>AVT – Biochemical Engineering, RWTH Aachen University, DE

10 <sup>3</sup>Joint BioEnergy Institute, Emeryville, CA 94608, USA.

11 <sup>4</sup>Novo Nordisk Foundation Center for Biosustainability, Technical University of  
12 Denmark, DK-2800 Lyngby, DK

13 <sup>5</sup>Lawrence Berkeley National Laboratory, Biological Systems and Engineering Division,  
14 Berkeley, CA 94720, USA.

15 <sup>6</sup>Virtual Institute of Microbial Stress and Survival, Lawrence Berkeley National  
16 Laboratory, Berkeley, CA

17 <sup>7</sup>Physical Biosciences Division, Lawrence Berkeley National Laboratory, Berkeley, CA

18 <sup>8</sup>Dept. of Bioengineering, University of California, Berkeley, CA

19 <sup>9</sup>Dept. of Chemical Engineering, University of California, Berkeley, CA

20 <sup>10</sup>Synthetic Biochemistry Center, Institute for Synthetic Biology, Shenzhen Institutes for  
21 Advanced Technologies, Shenzhen, China

22  
23 \* Corresponding author

24 § Present address: Australian Institute for Bioengineering and Nanotechnology (AIBN),  
25 The University of Queensland, Brisbane, QLD 4072, Australia

26 **Running title: NADH dehydrogenase deficiency in *P. taiwanensis***

27 **Keywords** *Pseudomonas*; NADH dehydrogenase; respiratory activity; oxidative stress;  
28 electron transport chain

29

## 30 **Abstract**

31 Obligate aerobic organisms rely on a functional electron transport chain for energy  
32 generation and NADH oxidation. Because of this essential requirement, the genes of  
33 this pathway are likely constitutively and highly expressed to avoid a cofactor imbalance  
34 and energy shortage under fluctuating environmental conditions.

35 We here investigated the essentiality of the three NADH dehydrogenases of the  
36 respiratory chain of the obligate aerobe *Pseudomonas taiwanensis* VLB120 and the  
37 impact of the knockouts of corresponding genes on its physiology and metabolism.  
38 While a mutant lacking all three NADH dehydrogenases seemed to be nonviable, the  
39 generated single or double knockout strains displayed none or only a marginal  
40 phenotype. Only the mutant deficient in both type 2 dehydrogenases showed a clear  
41 phenotype with biphasic growth behavior and strongly reduced growth rate in the  
42 second phase. In-depth analyses of the metabolism of the generated mutants including  
43 quantitative physiological experiments, transcript analysis, proteomics and enzyme  
44 activity assays revealed distinct responses to type II and type I dehydrogenase  
45 deletions. An overall high metabolic flexibility enables *P. taiwanensis* to cope with the  
46 introduced genetic perturbations and maintain stable phenotypes by rerouting of  
47 metabolic fluxes.

48 This metabolic adaptability has implications for biotechnological applications. While the  
49 phenotypic robustness is favorable in large-scale applications with inhomogeneous  
50 conditions, versatile redirecting of carbon fluxes upon genetic interventions can frustrate  
51 metabolic engineering efforts.

52

## 53 **Importance**

54 While *Pseudomonas* has the capability for high metabolic activity and the provision of  
55 reduced redox cofactors important for biocatalytic applications, exploitation of this

56 characteristic might be hindered by high, constitutive activity of and consequently  
57 competition with the NADH dehydrogenases of the respiratory chain. The in-depth  
58 analysis of NADH dehydrogenase mutants of *Pseudomonas taiwanensis* VLB120  
59 presented here, provides insight into the phenotypic and metabolic response of this  
60 strain to these redox metabolism perturbations. The observed great metabolic flexibility  
61 needs to be taken into account for rational engineering of this promising  
62 biotechnological workhorse towards a host with controlled and efficient supply of redox  
63 cofactors for product synthesis.

64

## 65 **Introduction**

66 Many industrially relevant molecules, e. g., ethanol, butanediol or isoprene, are more  
67 reduced than the industrially-used sugars glucose and sucrose or alternative, upcoming  
68 carbon sources such as xylose or glycerol (1-3). The microbial production of those  
69 favored compounds hence is inherently redox limited, i.e. by the supply of reduced  
70 redox cofactors, generally NADH or NADPH. This bottleneck has been overcome in  
71 some cases, e.g., 1,4 butanediol and 1,3-propanediol production in *Escherichia coli* (4,  
72 5) or L-lysine synthesis in *Corynebacterium glutamicum* (6). Applied strategies are  
73 optimization of the host metabolism by metabolic engineering (4, 7, 8) or adaptation of  
74 process conditions by (co-)feeding reduced substrates (9), applying microaerobic  
75 conditions or by nongrowing cells with reduced competition and cellular demand for the  
76 redox cofactor (10-13). Alternatively, microorganisms can be applied that naturally  
77 outperform the classic, industrial workhorses with respect to redox cofactor supply.  
78 Pseudomonads are outstanding in this regard as they exhibit a driven-by-demand  
79 phenotype, which allows them to strongly enforce the metabolic activity under stress  
80 conditions with increased energy demand, reported to result in a more than 2-fold  
81 carbon uptake rate and an even 8-fold increase of the NAD(P)H regeneration rate  
82 relative to standard growth conditions (12, 14, 15). This behavior holds great promise  
83 for using this species for the bioproductions of highly reduced chemicals such as  
84 phenol, (S)-styrene oxide, rhamnolipids, and methyl ketones (16-20). Yet, competition is  
85 high as the NAD<sup>+</sup>/NADH couple functions as cofactor in over 300 oxidation/reduction  
86 reactions (21). The obligate aerobic lifestyle of *Pseudomonas* without apparent  
87 fermentative metabolism necessitates constitutive activity of the NADH dehydrogenases  
88 to ensure adequate oxidation of NADH to NAD<sup>+</sup>. Hence, we argue here that a naturally  
89 high NADH oxidation activity might impair the effective fueling of production pathways  
90 with reducing equivalents. We here set out to provide an in-depth analysis of the redox  
91 metabolism of *Pseudomonas taiwanensis* VLB120, a strictly aerobic bacterium, focusing

92 on the role and essentiality of the single NADH dehydrogenases for NADH oxidation  
93 and energy generation.

94 The genome of *P. taiwanensis* VLB120 encodes two types of NADH dehydrogenases,  
95 type I (EC 7.1.1.2) and two isoforms of type II (EC 1.6.99.3). Type I is encoded by the  
96 genes PVLB\_15600-15660 designated as the *nuo* operon and often referred to as  
97 complex 1 (22). Nuo is a multisubunit enzyme complex and couples the electron  
98 transfer to proton translocation (23). The resulting proton gradient can then be used by  
99 the ATP synthase for the generation of ATP. The two type II NADH dehydrogenases,  
100 also termed alternative NADH dehydrogenase, are encoded by PVLB\_13270 and  
101 PVLB\_21880, designated as *ndh1* and *ndh2*, respectively. Ndh1 and Ndh2, both consist  
102 of a single polypeptide chain; they transfer electrons from NADH to ubiquinone but do  
103 not contribute to the membrane potential (23, 24). The amino acid sequence of the  
104 NADH dehydrogenases *ndh2* and *nuoA-N* of *P. taiwanensis* VLB120 and *Pseudomonas*  
105 *putida* KT2440 share a 96% homology.

106 In this study, NADH dehydrogenase mutants of *P. taiwanensis* VLB120 were generated  
107 and characterized regarding growth, respiratory activity, and transcriptional and  
108 proteomic changes to elucidate the impact of redox metabolism perturbation on the  
109 cellular physiology.

## 110 **Materials and Methods**

### 111 **Strains, media and culture conditions**

112 Bacterial strains used in this study are listed in Table 1. Strains were propagated in  
113 Lysogeny Broth (LB) containing 10 g L<sup>-1</sup> peptone, 5 g L<sup>-1</sup> sodium chloride, and 5 g L<sup>-1</sup>  
114 yeast extract (25). Cetrimide agar (Sigma-Aldrich, St. Louis, MO, USA) was used after  
115 mating procedures to select for *Pseudomonas*. Growth and characterization  
116 experiments were performed using mineral salt medium (MSM) (26) containing 3.88 g L<sup>-1</sup>  
117 <sup>1</sup> K<sub>2</sub>HPO<sub>4</sub>, 1.63 g L<sup>-1</sup> NaH<sub>2</sub>PO<sub>4</sub>, 2 g L<sup>-1</sup> (NH<sub>4</sub>)<sub>2</sub>SO<sub>4</sub>, 0.1 g L<sup>-1</sup> MgCl<sub>2</sub>·6H<sub>2</sub>O, 10 mg L<sup>-1</sup>

118 EDTA, 2 mg L<sup>-1</sup> ZnSO<sub>4</sub>·7 H<sub>2</sub>O, 1 mg L<sup>-1</sup> CaCl<sub>2</sub>·2H<sub>2</sub>O, 5 mg L<sup>-1</sup> FeSO<sub>4</sub>·7 H<sub>2</sub>O, 0.2 mg L<sup>-1</sup>  
 119 Na<sub>2</sub>MoO<sub>4</sub>·2H<sub>2</sub>O, 0.2 mg L<sup>-1</sup> CuSO<sub>4</sub>·5 H<sub>2</sub>O, 0.4 mg L<sup>-1</sup> CoCl<sub>2</sub>·6 H<sub>2</sub>O, 1 mg L<sup>-1</sup> MnCl<sub>2</sub>·2  
 120 H<sub>2</sub>O supplemented with 25 mM glucose. For preparation of solid LB, 1.5% agar was  
 121 added to the medium. For plasmid maintenance and in the gene deletion procedure,  
 122 antibiotics were added to the medium as required. Gentamycin and Kanamycin were  
 123 used at concentrations of 25 mg L<sup>-1</sup> and 50 mg L<sup>-1</sup>, respectively.

124 **Table 1** Bacterial strains used in this study.

| Strain                            | Relevant characteristics <sup>a</sup>                                                                                                                                                                                     | Reference                   |
|-----------------------------------|---------------------------------------------------------------------------------------------------------------------------------------------------------------------------------------------------------------------------|-----------------------------|
| <b><i>E. coli</i></b>             |                                                                                                                                                                                                                           |                             |
| DH5α                              | <i>fhuA2 lac(del)U169 phoA glnV44</i><br>Φ80' <i>lacZ(del)M15 gyrA96 recA1</i><br><i>relA1 endA1 thi-1 hsdR17</i>                                                                                                         | NEB                         |
| DH5αλpir1                         | F <sup>-</sup> , Δ <i>lac169</i> , <i>rpoS</i> (Am), <i>robA1</i> ,<br><i>creC510</i> , <i>hsdR514</i> , <i>endA</i> ,<br><i>recA1uidA(ΔMluI)::pir-116</i> ; host for<br><i>oriV</i> (R6K) vectors in high copy<br>number | Thermo Fisher<br>Scientific |
| HB101 pRK2013                     | <i>SmR</i> , <i>hsdR-M+</i> , <i>proA2</i> , <i>leuB6</i> , <i>thi-1</i> ,<br><i>recA</i> ; bears plasmid pRK2013                                                                                                         | (27)                        |
| DH5α pSW-2                        | Gm <sup>r</sup> , DH5α bearing pSW-2                                                                                                                                                                                      | (28)                        |
| DH5αλpir1 pEMG                    | Km <sup>r</sup> , DH5αλpir1 bearing plasmid<br>pEMG                                                                                                                                                                       | (28)                        |
| DH5αλpir1<br>pEMG_ko_ndh1         | Km <sup>r</sup> , PVLB_13270 deletion plasmid                                                                                                                                                                             | This study                  |
| DH5αλpir1<br>pEMG_ko_ndh2         | Km <sup>r</sup> , PVLB_21880 deletion plasmid                                                                                                                                                                             | This study                  |
| DH5αλpir1<br>pEMG_ko_nuo          | Km <sup>r</sup> , PVLB_15600-15660 deletion<br>plasmid                                                                                                                                                                    | This study                  |
| <b><i>P. taiwanensis</i></b>      |                                                                                                                                                                                                                           |                             |
| VLB120                            | wild type                                                                                                                                                                                                                 | (29)                        |
| VLB120 pSTY <sup>-</sup>          | VLB120 devoid of megaplasmid<br>pSTY <sup>-</sup>                                                                                                                                                                         | Wynands et al.<br>submitted |
| VLB120 Δ <i>ndh1</i>              | Δ <i>ndh1</i> (PVLB_13270), pSTY <sup>-</sup>                                                                                                                                                                             | This study                  |
| VLB120 Δ <i>ndh2</i>              | Δ <i>ndh2</i> (PVLB_21880), pSTY <sup>-</sup>                                                                                                                                                                             | This study                  |
| VLB120 ΔΔ <i>ndh</i>              | ΔΔ <i>ndh</i> (PVLB_13270, PVLB_21880),<br>pSTY <sup>-</sup>                                                                                                                                                              | This study                  |
| VLB120 Δ <i>nuo</i>               | Δ <i>nuo</i> (PVLB_15600-15660), pSTY <sup>-</sup>                                                                                                                                                                        | This study                  |
| VLB120 Δ <i>nuo</i> Δ <i>ndh1</i> | Δ <i>ndh1</i> (PVLB_13270), Δ <i>nuo</i><br>(PVLB_15600-15660), pSTY <sup>-</sup>                                                                                                                                         | This study                  |

125 <sup>a</sup> Gm<sup>r</sup>, Km<sup>r</sup>, gentamycin, kanamycin resistance, respectively.

126

127 Batch flask experiments were performed in 50 mL medium in 500-mL flasks on a  
128 horizontal rotary shaker with a throw of 50 mm and frequency of 300 rpm. *E. coli* was  
129 grown at 37 °C, *Pseudomonas* at 30 °C. The chemicals used in this work were obtained  
130 from Carl Roth (Karlsruhe, Germany), Sigma-Aldrich (St. Louis, MO, USA), or Merck  
131 (Darmstadt, Germany), unless stated otherwise. The main cultures were inoculated  
132 from liquid pre-cultures to an approximate OD<sub>600nm</sub> of 0.05. All experiments were  
133 performed in biological triplicates unless stated otherwise.

### 134 **Plasmid cloning and generation of deletion strains**

135 Genomic DNA of *P. taiwanensis* VLB120 was isolated using the High Pure PCR  
136 Template Preparation Kit (Hoffmann-La-Roche, Basel, Switzerland). Upstream (TS1)  
137 and downstream (TS2) regions with a length of 400-800 bp flanking the specific target  
138 gene were amplified using Q5 High-Fidelity Polymerase (New England Biolabs, Ipswich,  
139 MA, USA). Primers were ordered as unmodified DNA Oligonucleotides from Eurofins  
140 Genomics (Ebersberg, Germany) and are listed in Supplementary Table S1. The  
141 suicide delivery vector pEMG was isolated using the NEB Monarch Plasmid Miniprep Kit  
142 (New England Biolabs, Ipswich, MA, USA). The isolated plasmid was digested with  
143 restriction enzymes purchased from New England Biolabs (Ipswich, MA, USA). For  
144 plasmid construction, Gibson Assembly using NEB Builder Hifi DNA Assembly (New  
145 England Biolabs, Ipswich, MA, USA) was used. Plasmids were transformed into  
146 electrocompetent *E. coli* DH5 $\alpha$ pir1 via electroporation (30). Transformants and  
147 chromosomally engineered *Pseudomonas* were screened by colony PCR using OneTaq  
148 2x Master Mix (New England Biolabs, Ipswich, MA, USA). The cell material was lysed in  
149 alkaline polyethylene glycol for enhanced colony PCR efficiency as described previously  
150 (31).

151 Targeted gene deletions were performed using the I-SceI-based system developed by  
152 Martinez-Garcia and de Lorenzo (28). The conjugational transfer of the mobilizable

153 knock-out plasmids from *E. coli* DH5 $\alpha$ pir1 to *Pseudomonas* was performed via  
154 triparental patch mating (16). After conjugation, the pSW-2 plasmid encoding the I-SceI-  
155 endonuclease was conjugated into *Pseudomonas* co-integrates. The addition of 3-  
156 methylbenzoate for the induction of I-SceI expression was omitted as the basal  
157 expression level was sufficient. Kanamycin-selective clones were directly isolated,  
158 positive clones were cured of pSW-2 and restreaked several times. The gene deletion  
159 was confirmed by colony PCR and Sanger sequencing.

### 160 **Analytical methods**

161 The optical density of cell suspensions was measured at a wavelength of 600 nm using  
162 an Ultrospec 10 spectrophotometer (GE Healthcare, Chicago, IL, USA). The cell dry  
163 weight (CDW) was calculated by multiplying OD<sub>600nm</sub> with a gravimetrically determined  
164 correlation factor of 0.39. For HPLC analysis the samples were centrifuged at 17,000 x  
165 g for 5 min and the supernatant was stored at -20°C until further analysis.

166 Glucose and gluconate concentrations were measured by high-performance liquid  
167 chromatography using a Beckman System Gold 126 Solvent Module equipped with a  
168 System Gold 166 UV-detector (Beckman Coulter) and a Smartline RI detector 2300  
169 (KNAUER Wissenschaftliche Geräte, Berlin, Germany). Analytes were separated on the  
170 organic resin column Metab AAC (ISERA, Düren, Germany) eluted with 5 mM H<sub>2</sub>SO<sub>4</sub> at  
171 an isocratic flow of 0.6 mL min<sup>-1</sup> at 40 °C for 20 min. Glucose and gluconate were  
172 analyzed using the RI detector whereas gluconate was determined with the UV detector  
173 at a wavelength of 210 nm.

### 174 **Proteomic profiling of NADH dehydrogenase mutants**

175 Samples for proteome profiling were taken during early-, mid-, and late-exponential  
176 growth at an OD<sub>600nm</sub> of 0.5, 2.5, and after depletion of glucose, checked with test strips  
177 for rapid detection of glucose (Medi-Test, Macherey-Nagel, Düren, Germany),  
178 respectively. Proteins were extracted from cell biomass and subsequently prepared for  
179 shotgun proteomic experiments as described previously (32). All samples were



180 analyzed on an Agilent 6550 iFunnel Q-TOF mass spectrometer (Agilent Technologies,  
181 Santa Clara, CA) coupled to an Agilent 1290 UHPLC system. Twenty (20)  $\mu\text{g}$  of  
182 peptides were separated on a Sigma–Aldrich Ascentis Peptides ES-C18 column (2.1  
183 mm  $\times$  100 mm, 2.7  $\mu\text{m}$  particle size, operated at 60°C) at a 0.400 mL  $\text{min}^{-1}$  flow rate and  
184 eluted with the following gradient: initial condition was 95% solvent A (0.1% formic acid)  
185 and 5% solvent B (99.9% acetonitrile, 0.1% formic acid). Solvent B was increased to  
186 35% over 120 min, and then increased to 50% over 5 min, then up to 90% over 1 min,  
187 and held for 7 min at a flow rate of 0.6 mL  $\text{min}^{-1}$ , followed by a ramp back down to 5% B  
188 over 1 min where it was held for 6 min to re-equilibrate the column to original conditions.  
189 Peptides were introduced to the mass spectrometer from the LC by using a Jet Stream  
190 source (Agilent Technologies) operating in positive-ion mode (3,500 V). Source  
191 parameters employed gas temp (250°C), drying gas (14 L  $\text{min}^{-1}$ ), nebulizer (35 psig),  
192 sheath gas temp (250°C), sheath gas flow (11 L  $\text{min}^{-1}$ ), VCap (3,500 V), fragmentor  
193 (180 V), OCT 1 RF Vpp (750 V). The data were acquired with Agilent MassHunter  
194 Workstation Software, LC/MS Data Acquisition B.06.01 operating in Auto MS/MS mode  
195 whereby the 20 most intense ions (charge states, 2–5) within 300–1,400 m/z mass  
196 range above a threshold of 1,500 counts were selected for MS/MS analysis. MS/MS  
197 spectra (100–1,700 m/z) were collected with the quadrupole set to “medium” resolution  
198 and were acquired until 45,000 total counts were collected or for a maximum  
199 accumulation time of 333 ms. Former parent ions were excluded for 0.1 min following  
200 MS/MS acquisition. The acquired data were exported as mgf files and searched against  
201 the pan proteome that is highly related to *Pseudomonas taiwanensis* VLB120 with  
202 Mascot search engine version 2.3.02 (Matrix Science). The resulting search results  
203 were filtered and analyzed by Scaffold v 4.3.0 (Proteome Software Inc.). The  
204 normalized spectra count of each sample were exported from Scaffold, and the relative  
205 quantity changes of identified proteins in mutant samples were calculated in comparison  
206 to wild type sample. The statistical significance of these changes and the adjusted p-

207 values were evaluated by limma R package. The mass spectrometry proteomics data  
208 have been deposited to the ProteomeXchange Consortium via the PRIDE (33) partner  
209 repository with the dataset identifier PXD013623 and 10.6019/PXD013623.

## 210 **RNA preparation and analysis**

211 Samples for transcription analysis were taken during early-, mid- and late-exponential  
212 growth at an OD<sub>600nm</sub> of approximately 0.5, approximately 2.5 and after glucose  
213 depletion, respectively. Prior to RNA isolation, the culture sample was diluted with the  
214 DNA/RNA protection reagent of the Monarch Total RNA Miniprep Kit (New England  
215 Biolabs, Ipswich, MA, USA), followed mechanical lysis with ZR BashingBead™ Lysis  
216 Tube (0.5mm) (Zymo Research, Irvine, CA, USA) for 1 min using the Mini-Beadbeater-  
217 16 (Biospec, Bartlesville, OK, USA). After a centrifugation step at 16,000 x g for 2 min  
218 the supernatant was transferred into a new tube. An equal volume of RNA lysis buffer of  
219 the Monarch Total RNA Miniprep Kit was added, and the RNA isolation was continued  
220 as described in the supplier's manual. After the last elution step, an additional in-tube  
221 DNase treatment was done using RNase-free DNaseI (New England Biolabs, Ipswich,  
222 MA, USA). The final RNA yield and purity were evaluated by the absorption ratio  
223  $A_{260}/A_{280}$  measured with a Nanodrop (Thermo Scientific, Rockford, IL, USA). The  
224 synthesis of cDNA for reverse transcription was carried out with a Protoscript II first  
225 strand cDNA synthesis kit (New England Biolabs, Ipswich, MA, USA) using 120 ng total  
226 RNA and 60  $\mu$ M random hexamers. The qPCR analyses were conducted with 5  $\mu$ L of  
227 the reverse transcription reaction mixture with gene-specific primers (Supplementary  
228 Table S1) and the Luna Universal qPCR Master Mix (New England Biolabs, Ipswich,  
229 MA, USA) was used. Primers for qPCR were designed with the PrimerQuest Tool of IDT  
230 technologies. Gene expression levels for each individual sample were normalized  
231 relative to the internal reference gene, *rpoB* and the wild type in the corresponding  
232 growth phase calculated by a mathematical method based on the calculated real-time  
233 PCR efficiencies (34). The qPCR was performed with the CFX96 Real-Time PCR

234 Detection System (Biorad, Hercules, CA, USA). All qPCR reactions were performed in  
235 triplicates.

### 236 **Inverted membrane vesicle preparation and NADH oxidation activity**

237 Cultures were harvested at early-exponential growth phase at an optical density  
238 ( $OD_{600nm}$ ) of approximately 0.5, as well as in the late-exponential growth phase  
239 ( $OD_{600nm}$ , of 3-4). Inverted membrane vesicles were prepared as described by Borisov  
240 (35). Briefly, cells were centrifuged for 8 min at 5,000 x g and resuspended in 2 mL  
241 spheroplast buffer (200 mM Tris-HCl pH 8.0, 2 mM EDTA, 30% sucrose), centrifuged  
242 again and resuspended in 1 mL spheroplast buffer. Spheroplasts were prepared using  
243 lysozym (0.03 g) and incubated for 30 min at room temperature. Spheroplasts were  
244 centrifuged for 10 min at 5,000 x g and resuspended in 2 mL sonication buffer (100 mM  
245 HEPES-KOH pH 7.5, 50 mM  $K_2SO_4$ , 10 mM  $MgSO_4$ , 2 mM DTT, 0.5 mM PMSF). The  
246 vesicles were sonicated (Bioruptor, Diadenode, Belgium) in 4 cycles à 30 sec at high  
247 intensity with an intermediate pause of 30 sec in ice water. The inverted membrane  
248 vesicles were centrifuged twice for 10 min at 5,000 x g to remove cell debris. The  
249 supernatant was centrifuged for 30 min at 120,000 x g and the resulting pellet was  
250 resuspended in the assay buffer (25 mM HEPES, 25 mM BIS-TRIS propane pH 7, 10  
251 mM  $MgSO_4$ ).

252 The freshly prepared inverted membrane vesicles were immediately used for the  
253 determination of the NADH oxidation activity as we observed a rapid activity decline  
254 when the membrane samples were stored on ice. 150  $\mu L mL^{-1}$  isolated membrane  
255 fractions were added to the assay buffer and the reaction was initiated by the addition of  
256 125  $\mu M$  NADH, the total volume of the assay was 200  $\mu L$ . The NADH oxidation was  
257 monitored over 30 min at 340 nm in a Synergy<sup>TM</sup> MX microplate reader (BioTek,  
258 Winooski, VT, USA). For calculating the specific enzyme activity, we used the NADH  
259 molar extinction coefficient  $\epsilon_{NADH} = 6.22 \text{ mM}^{-1} \text{ cm}^{-1}$ ; one unit of activity was the quantity  
260 that catalyzed the oxidation of 1  $\mu mol$  of NADH per min. The protein concentration was

261 measured with the reducing agent compatible Pierce BCA Protein Assay Kit (Thermo  
262 Scientific, Rockford, IL, USA).

### 263 **Respiration activity monitoring**

264 The cultivations and measurements of the oxygen transfer rate (OTR) and the carbon  
265 dioxide transfer rate (CTR) were performed in a modified RAMOS System, developed  
266 by the Chair of Biochemical Engineering (RWTH Aachen University) (36, 37). The  
267 standard RAMOS for shake flasks is commercially available from the Kühner AG  
268 (Birsfelden, Switzerland) or HiTec Zang GmbH (Herzogenrath, Germany). All  
269 cultivations were performed in 250-mL Ramos flasks with 10 % (v/v) filling volume using  
270 MSM medium supplemented with 25 mM glucose. The cultures were inoculated from  
271 liquid pre-cultures to an approximate  $OD_{600nm}$  of 0.05. The OTR and CTR were  
272 measured thrice per hour. All experiments were performed in biological duplicates.

### 273 **Redox cofactor quantification**

274 Samples for redox cofactor analysis were collected from early-, mid-, and late-  
275 exponential growth phase at  $OD_{600nm}$  of approximately 0.6, 2.2 and 4.0, respectively.  
276 The samples were rapidly transferred into a 15-mL falcons tube containing 5 mL of  
277 quenching solution (acetonitrile:methanol:water, 40:40:20, v/v) with  $^{13}C$  labelled cell  
278 extracts at  $-40^{\circ}C$ .

279 After three freeze-thaw cycles, the samples were centrifuged at 13,000 x g for 5 min  
280 and concentrated by evaporating the quenching solvent using a vacuum concentrator  
281 (SAVANT, SpeedVac, Thermo Fisher Scientific, San Diego, CA, USA) for 5 hours  
282 followed by lyophilization (LABCONCO, FreeZone, Kansas City, MO, USA). All dried  
283 extracts were stored  $-80^{\circ}C$  until analysis or re-suspended in LC-MS grade water for  
284 LC-MS analysis.

285 All redox cofactor metabolites were measured on an AB SCIEX Qtrap1 5500 mass  
286 spectrometer (AB SCIEX, Framingham, MA, USA) operated in negative ion and

287 selected multiple reaction monitoring (MRM) mode. The column XSELECT HSS XP  
288 (150 mm × 2.1 mm × 2.5 μm) (Waters, Milford, MA, USA) with ion-pairing technique was  
289 used for the chromatography separation as previously described (38). Peak integration  
290 and metabolite quantification were performed using an isotope-ratio-based approach on  
291 Multi-Quant™ 3.0.2 (AB SCIEX) software as previously described (39, 40).

292 **Results**

293 ***P. taiwanensis* VLB120 can easily compensate for single NADH dehydrogenase**  
294 **gene deletions.**

295 The NADH dehydrogenase type I operon encoded by *nuoA-N* (PVLB\_15600-15660)  
296 and the two type II NADH dehydrogenases encoded by *ndh1* (PVLB\_13270) and *ndh2*  
297 (PVLB\_21880) were successfully deleted from the *P. taiwanensis* VLB120 genome  
298 using the I-SceI-based pEMG plasmid (28). The double knockout mutants  $\Delta\Delta ndh$  and  
299  $\Delta nuo\Delta ndh1$  were successfully obtained, however several attempts failed to generate  
300 the double knockout of  $\Delta nuo$  and  $\Delta ndh2$  (Table 2). All gene deletions were confirmed by  
301 Sanger sequencing. The five NADH-dehydrogenase mutants demonstrated that the  
302 NADH dehydrogenases, Nuo, Ndh1, and Ndh2 are not essential individually. While the  
303 presence of either Nuo or Ndh2 is sufficient to sustain viability of *P. taiwanensis*  
304 VLB120, Ndh1 seems to be unable to compensate for the loss of Nuo and Ndh2.  
305 Similarly, for *P. aeruginosa* PAO1 it has been reported that single deletions of NADH  
306 dehydrogenases result in no growth defect and no decrease in NADH oxidation activity,  
307 whereas the double ( $\Delta nuoIJ\Delta ndh$ ) and triple knockout ( $\Delta nuoIJ\Delta ndh\Delta nqrA-F$ ) had no  
308 NADH oxidation activity (41). Concludingly, Nuo and Ndh account for the total NADH  
309 dehydrogenase activity in this *Pseudomonas* strain. A likewise total loss of NADH  
310 dehydrogenase activity in the obligate aerobic *P. taiwanensis* VLB120 strain seems to  
311 be lethal indicating that the strain relies on the presence of NADH dehydrogenases for  
312 NADH oxidation and that alternative, native NADH consuming reactions do not suffice  
313 to efficiently re-oxidize this vital cofactor under the tested conditions.

314

315 **Table 2.** Overview of the NADH dehydrogenase mutants generated in this study. ‘X’  
 316 ‘indicates successful gene deletion.

| Strain                    | NADH dehydrogenase type I        |  | NADH dehydrogenase type II |                          |
|---------------------------|----------------------------------|--|----------------------------|--------------------------|
|                           | <i>nuoA-N</i> (PVLB_15600-15660) |  | <i>ndh1</i> (PVLB_13270)   | <i>ndh2</i> (PVLB_21880) |
| Wild type                 | present                          |  | present                    | present                  |
| $\Delta ndh1^a$           | present                          |  | X                          | present                  |
| $\Delta ndh2^a$           | present                          |  | present                    | X                        |
| $\Delta\Delta ndh^a$      | present                          |  | X                          | X                        |
| $\Delta nuo^a$            | X                                |  | present                    | present                  |
| $\Delta nuo\Delta ndh1^a$ | X                                |  | X                          | present                  |

317 <sup>a</sup> The megaplasmid pSTY (42) was absent in all mutants.

318

319 **The  $\Delta\Delta ndh$  mutant showed a growth-phase dependent growth defect**

320 *P. taiwanensis* VLB120 and the five NADH dehydrogenase deletion strains  $\Delta ndh1$ ,  
 321  $\Delta ndh2$ ,  $\Delta\Delta ndh$ ,  $\Delta nuo$ , and  $\Delta nuo\Delta ndh1$  were characterized for growth, glucose utilization,  
 322 CO<sub>2</sub> formation, and oxygen consumption in batch shake-flask experiments. The single  
 323 NADH-dehydrogenase type II mutants,  $\Delta ndh1$  and  $\Delta ndh2$ , showed the same growth and  
 324 sugar co-utilization profile as the wild type *P. taiwanensis* VLB120 (Figure 1A, B, and  
 325 C). The loss of the megaplasmid pSTY during NADH dehydrogenase deletions resulted  
 326 in a growth advantage for the generated mutants, which was determined to result in a  
 327 14% higher growth rate for *P. taiwanensis* VLB120 pSTY<sup>-</sup> compared to the pSTY<sup>+</sup> wild  
 328 type (data not shown). For a comparison of mutants and wild type, the growth rate of  
 329 the wild type was corrected accordingly and is referred to as  $\mu_{recalc}$ .

330 Both NADH dehydrogenases type I mutants  $\Delta nuo$  and  $\Delta nuo\Delta ndh1$  exhibited wild type-  
 331 like growth and carbon uptake rates (Figure 1, Table 3). However, the glucose utilization  
 332 in both type 1 deletion strains differed remarkably. *Pseudomonas* can catabolize  
 333 glucose either via the phosphorylative or the oxidative pathway. In the latter, glucose is  
 334 oxidized to gluconate in the periplasm by a membrane-bound glucose dehydrogenase  
 335 (*gcd*) coupled to the reduction of pyrroloquinoline quinone (PQQ) (Figure 6). The  
 336 phosphorylative pathway starts in the cytoplasm with the phosphorylation of glucose to



337 glucose-6-phosphate catalysed by the glucokinase (Glk) (43, 44). The type I  
338 dehydrogenase mutants,  $\Delta nuo$  and  $\Delta nuo\Delta ndh1$ , accumulated gluconate to up to 16 mM,  
339 twice as high as the concentration of the wild type and all type II deletion strains,  $\Delta ndh1$ ,  
340  $\Delta ndh2$ , and  $\Delta\Delta ndh$  (Figure 1E-F).

341 In contrast, the type II double mutant  $\Delta\Delta ndh$  reproducibly showed two growth phases  
342 (Figure 1D). After comparable growth to the wild type (Figure 1A), in the mid-  
343 exponential growth phase, the growth rate dropped drastically marking the second  
344 growth phase. Interestingly, the strong decrease of the growth rate ( $\sim 86\%$ ) was not  
345 correlated with an equal reduction of the carbon uptake, which showed a decrease of  
346 only  $\sim 38\%$ .

347

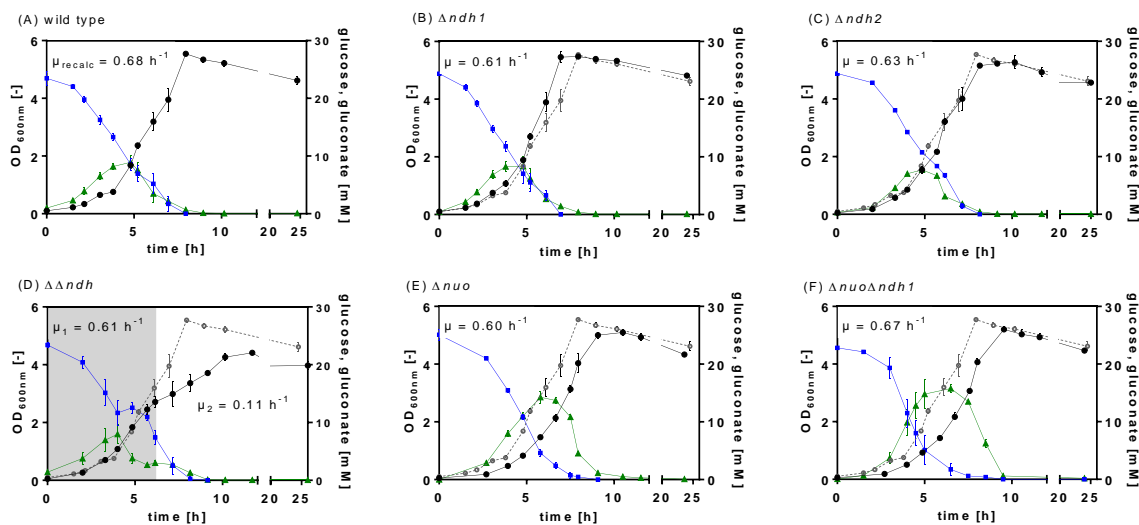

348

349 **Figure 1.** Physiological characterization of *P. taiwanensis* VLB120 (A) and the NADH  
350 dehydrogenase deficient mutants  $\Delta ndh1$  (B),  $\Delta ndh2$  (C),  $\Delta\Delta ndh$  (D),  $\Delta nuo$  (E), and  
351  $\Delta nuo\Delta ndh1$  (F). The strains were cultured in MSM with 25 mM glucose. The OD<sub>600nm</sub>  
352 (black circles), glucose (blue squares), gluconate (green triangles) were measured over  
353 time. The shadowed area in (D) indicates the first growth phase. The data shown are  
354 the mean of biological triplicates; error bars show the standard deviation.  $\mu_{\text{recalc}}$  is the



355 growth rate of *P. taiwanensis* VLB120 pSTY<sup>-</sup>. The wild type OD<sub>600nm</sub> are plotted (grey,  
 356 open circles) in graphs (B)-(F) for comparison.

357

358 **Table 3. Calculated carbon uptake rates and gluconate and oxygen consumption of wild type**  
 359 **and NADH dehydrogenase mutants during early-exponential growth.**

| Strain                  | Specific carbon uptake rate <sup>a</sup>               | Gluconate accumulation | Surplus O <sub>2</sub> consumption |
|-------------------------|--------------------------------------------------------|------------------------|------------------------------------|
|                         | [mmol g <sub>cdw</sub> <sup>-1</sup> h <sup>-1</sup> ] | [mM] <sup>b</sup>      | [mM] <sup>c</sup>                  |
| wild type               | 7.7                                                    | 8.9 ± 0.9              | 9.2 ± 0.9                          |
| $\Delta ndh1$           | 6.9                                                    | 8.6 ± 0.9              | 8.1 ± 0.1                          |
| $\Delta ndh2$           | 7.3                                                    | 7.7 ± 0.2              | 6.3 ± 0.4                          |
| $\Delta\Delta ndh$      | 8.8/3.3                                                | 8.8 ± 0.4              | 7.2 ± 1.2                          |
| $\Delta nuo$            | 7.1                                                    | 16.4 ± 0.4             | 12.9 ± 0.1                         |
| $\Delta nuo\Delta ndh1$ | 6.6                                                    | 16.1 ± 1.0             | 14.1 ± 2.9                         |

360 <sup>a</sup>For  $\Delta\Delta ndh$ , separate growth rates were determined for phase 1 (2-6 h) and phase 2 (6-  
 361 8 h). For all other mutants, growth rates were calculated for the exponential phase (~3-4  
 362 h until ~6-7 h after inoculation); <sup>b</sup>gluconate accumulation was calculated from offline  
 363 analytic of three biologically independent experiments; <sup>c</sup>the surplus oxygen consumption  
 364 was calculated from the sectional integrals between the OTR (mmol L<sup>-1</sup> h<sup>-1</sup>) and CTR  
 365 (mmol L<sup>-1</sup> h<sup>-1</sup>) of the first 6 hours of cultivation (Figure 2); shown is the mean of duplicate  
 366 experiments.

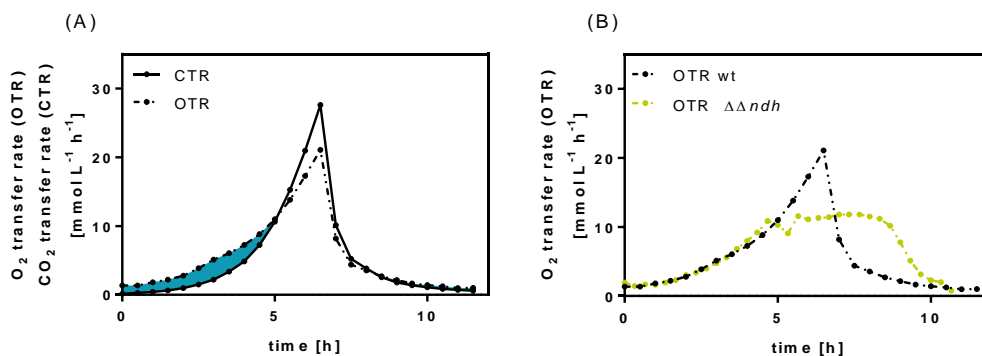

368 **Figure 2.** Respiratory activity during a cultivation of *P. taiwanensis* VLB120 and  $\Delta\Delta ndh$   
 369 mutant. (A) Highlighted area corresponding to the surplus of consumed oxygen,  
 370 calculated from the sectional integrals between the OTR (dashed line, in mmol L<sup>-1</sup> h<sup>-1</sup>)  
 371 and CTR (in mmol L<sup>-1</sup> h<sup>-1</sup>) on the example of *P. taiwanensis* VLB120. B) Oxygen  
 372 transfer rates (OTR, dashed line; in mmol L<sup>-1</sup> h<sup>-1</sup>) during a cultivation of *P. taiwanensis*  
 373 VLB120 and mutant  $\Delta\Delta ndh$ .

375

376 Besides the characterization for growth and glucose consumption, the respiratory  
377 behavior of the wild type and NADH dehydrogenase mutants was studied (Figure 2,  
378 Supplementary Figure S1). Again, only the  $\Delta\Delta ndh$  mutant showed a different phenotype  
379 characterized by a stagnating oxygen transfer rate (OTR) after 6 hours (Figure 2B). This  
380 change in the OTR development is an indication for product inhibition, here, potentially  
381 by NADH, which cannot be oxidized at the rate required for fast growth. The onset of  
382 the reduced specific oxygen uptake rate also correlated well with the change of the  
383 growth rate (Figure 1D). In case of growth on glucose, the expected respiratory quotient  
384 (RQ), defined as the ratio of OTR and CTR is close to 1. In contrast to this assumption,  
385 the measured OTR for all tested mutants during the first 6 hours of cultivation was  
386 higher than the CTR resulting in an RQ below 1 (Figure 2A, Supplementary Figure S1)  
387 due to the partial oxidation of glucose to gluconate in the periplasm (Figure 6). Indeed,  
388 the surplus of consumed oxygen calculated from the sectional integrals between the  
389 OTR and CTR ( $\int OTR dt - \int CTR dt$ ), correlated with the produced gluconate (Table 3,  
390 Figure 2A). During glucose conversion, roughly half of the overall consumed oxygen  
391 was used for the oxidation of glucose to gluconate and the re-oxidation of the reduced  
392 PQQ formed by the glucose dehydrogenase activity. Consequently, in the glucose  
393 phase, the cells can partially uncouple glucose oxidation and energy provision from  
394 NADH formation, relieving the dependence on NADH dehydrogenase activity. The  $O_2$   
395 and  $CO_2$  transfer rate (CTR) of  $\Delta ndh2$  and  $\Delta\Delta ndh$  (Supplementary Figure S1) showed a  
396 double peak, which occurred in the same time frame as glucose depletion, and, hence,  
397 might be due to the diauxic shift from glucose to gluconate. We assume that the diauxic  
398 shift also occurred in the other strains but was not recorded by the measurement  
399 frequency of three measurements per hour.

400 **NADH dehydrogenase gene deletions affect expression levels but do not result in**  
401 **altered *in vitro* NADH oxidation activities**

402 To further elucidate the NADH oxidation activity in the different mutants, and hence, the  
403 importance of the three NADH dehydrogenases for oxidizing NADH and fueling the  
404 electron transport chain, we performed *in vitro* NADH oxidation assays. Inverted  
405 membrane vesicles were prepared at early-, mid-, and late-exponential growth phase  
406 and the NADH oxidation rate was determined from the decrease of the absorbance at  
407 340 nm over time. As the SDS PAGE showed up to 21 prominent protein bands in the  
408 membrane fraction (data not shown), we cannot exclude activity of other membrane-  
409 bound NADH-dependent enzymes in the analyzed cytoplasmic fraction, e.g., the  
410 transhydrogenase PntAB, which might have contributed to NADH consumption.  
411 However, there is a high probability that NADH oxidation is very specific for NADH  
412 dehydrogenases as other NADH-dependent enzymes require electron acceptors other  
413 than O<sub>2</sub>. In the early-exponential growth phase, in which none of the strains showed a  
414 growth defect, all single mutants possessed NADH oxidation activities at levels similar  
415 to the wild type of around 1.2 U mg protein<sup>-1</sup> (Table 4), which is in the range of *in vitro*  
416 rates reported for other organisms (45). Overall, the NADH oxidation rate was rather  
417 stable in all mutants, indicating a high metabolic flexibility of *P. taiwanensis* VLB120 to  
418 maintain redox homeostasis.

419 To further substantiate this hypothesis, we examined potential changes at the  
420 transcriptional level by qPCR on samples taken in the early, mid-, and late-exponential  
421 growth phase. HPLC analysis showed that glucose and/or gluconate were still left when  
422 sampling the late-exponential growth phase, i.e., the cells were still metabolically active  
423 (data not shown). The fold changes were normalized against the wild type in the  
424 corresponding growth phase. The single and double deletions of NADH  
425 dehydrogenases type II encoding genes (Figure 3A-C) had only minor effects (max. fold  
426 change of 1) on the remaining NADH dehydrogenase gene expression. While the type I  
427 deletions strains,  $\Delta nuo$  and  $\Delta nuo\Delta ndh1$ , showed a substantial upregulation of the *ndh2*  
428 gene expression (Figure 3D-E), the expression of the *ndh1* gene in both the  $\Delta nuo$  and

429  $\Delta nuo\Delta ndh1$  was unaffected; we only observed a small increase for mutant  $\Delta nuo$  in the  
430 early growth phase. This finding suggests that  $ndh2$  is probably the only NADH  
431 dehydrogenase gene that is regulated by the cellular NADH economy. The consequent  
432 essentiality would further explain why the double deletion of  $nuo$  and  $ndh2$  was lethal.  
433 The observation shows that  $\Delta\Delta ndh$  is only growth impaired in the mid- to late-  
434 exponential phase. This indicates that either the Nuo complex is less active in the late  
435 growth phase or that the PQQ-dependent glucose dehydrogenase activity during the  
436 early growth phase enables sufficient ATP synthesis independent of NADH  
437 dehydrogenase activity.

438

439 **Table 4.** Specific NADH oxidation activities of inverted membrane vesicles of *P.*  
440 *taiwanensis* VLB120 wild type and NADH dehydrogenase mutants at early and late-  
441 exponential growth phase.

| Strain                  | Specific NADH<br>oxidation activity <sup>a</sup><br>(U mg <sub>protein</sub> <sup>-1</sup> ) |                      |
|-------------------------|----------------------------------------------------------------------------------------------|----------------------|
|                         | Early-<br>exponential                                                                        | Late-<br>exponential |
| Wild type               | 1.2 ± 0.2                                                                                    | 0.7 ± 0.2            |
| $\Delta ndh1$           | 1.3 ± 0.1                                                                                    | 0.5 ± 0.1            |
| $\Delta ndh2$           | 1.0 ± 0.2                                                                                    | 0.4 ± 0.1            |
| $\Delta\Delta ndh$      | 1.1 ± 0.1                                                                                    | 0.5 ± 0.2            |
| $\Delta nuo$            | 1.2 ± 0.1                                                                                    | 0.5 ± 0.1            |
| $\Delta nuo\Delta ndh1$ | 0.8 ± 0.1                                                                                    | 0.5 ± 0.2            |

<sup>a</sup> Mean values and standard deviations were determined from independent, biological triplicates

442

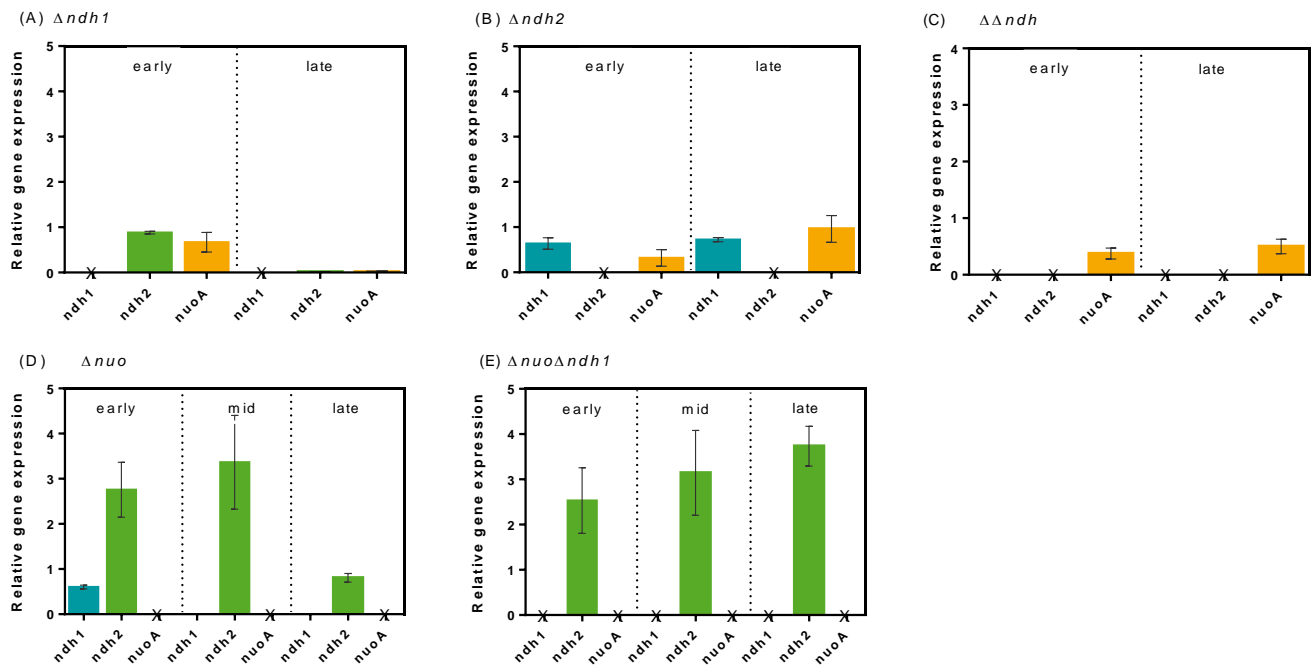

443  
 444 **Figure 3.** Relative gene expression of the NADH dehydrogenase encoding genes *ndh1*,  
 445 *ndh2*, and *nuoA* in NADH dehydrogenase mutants  $\Delta ndh1$  (A),  $\Delta ndh2$  (B),  $\Delta\Delta ndh$  (C),  
 446  $\Delta nuo$  (D), and  $\Delta nuo\Delta ndh1$  (E) at early-, mid-, and late-exponential growth phase  
 447 normalized to the corresponding values of the wild type. mRNA abundance was  
 448 determined by quantitative PCR. Values were normalized to the relative transcript level  
 449 of *P. taiwanensis* VLB120 in the corresponding growth phase. *nuoA* was used as a  
 450 proxy for the expression of the *nuo* operon. Gene deletions in the respective mutant are  
 451 marked with 'X' and were not analyzed by qPCR. Experiments were performed in  
 452 biological triplicates.

453  
 454 **Double deletion of the type II NADH dehydrogenases affect intracellular redox**  
 455 **cofactor levels**

456 We found that the NADH oxidation rate was not or only slightly compromised by the  
 457 introduced gene deletions but that the *ndh2* level was significantly upregulated  
 458 suggesting that its expression is controlled by the NADH level. For that reason, we  
 459 determined the intracellular abundance of NADH and NAD<sup>+</sup> in the early-, mid-, and late-  
 460 exponential growth phase. Since the two single mutants of type II had no growth

461 phenotype and showed no obvious changes on the transcriptional level, we restricted  
462 the analysis to the two double mutants and single *nuo* deletion mutant  $\Delta nuo$ ,  $\Delta\Delta ndh$ ,  
463 and  $\Delta nuo\Delta ndh1$ .

464 The  $\Delta nuo\Delta ndh1$  showed a higher NADH/NAD<sup>+</sup> ratio in the late-exponential growth  
465 phase but also high variability in the triplicate experiments curtailing the statistical  
466 significance. The double mutant  $\Delta\Delta ndh$  had a significantly increased NADH/NAD<sup>+</sup> ratio  
467 in the mid- and late-exponential growth phase compared to the wild type (Figure 4). This  
468 significantly increased NADH/NAD<sup>+</sup> ratio in  $\Delta\Delta ndh$  might have triggered the observed  
469 growth change in the mid-exponential growth phase.

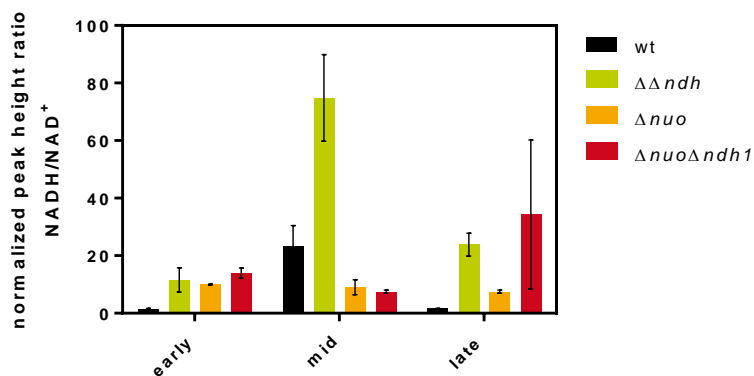

470 **Figure 4.** Quantification of the NADH/NAD<sup>+</sup> ratio in the *P. taiwanensis* VLB120 and the  
471 NADH dehydrogenase mutants  $\Delta\Delta ndh$ ,  $\Delta nuo$ , and  $\Delta nuo\Delta ndh1$  in early-, mid- and late-  
472 exponential growth phase.  
473

#### 474 **Proteomic analysis reveals rerouting of the carbon flux in the $\Delta\Delta ndh$ mutant**

475 We further performed shotgun proteomic analysis to explain possible metabolic  
476 changes in early-, mid-, and late-exponential growth phase in *P. taiwanensis* VLB120  
477 due to NADH dehydrogenase deletions. The relative quantitative results were used to  
478 categorize the detected proteins into three groups: (1) Significantly upregulated or (2)  
479 downregulated proteins (fold change > 2, adjusted p-value < 0.05), and (3) weak/no  
480 effect proteins (fold change < 2). The proteins were further grouped into functional  
481 categories according to the KEGG database classification (46), e.g., transport,  
482

483 carbohydrate metabolism, amino acid metabolism, Supplementary Table S 2) the most  
484 strongly represented categories are summarized in Figure 5.

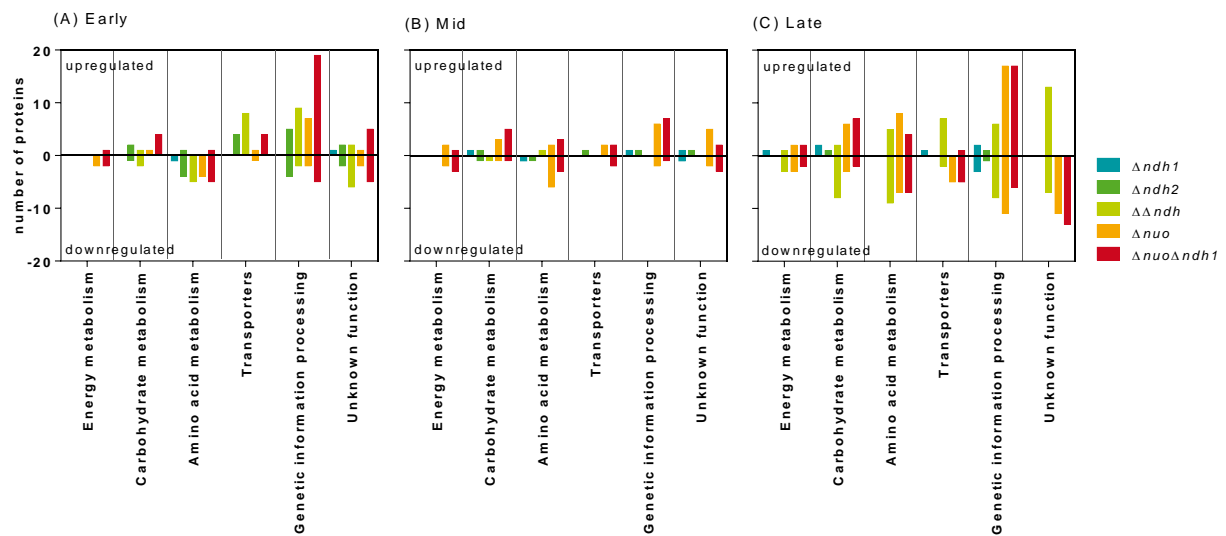

485  
486 **Figure 5.** Significant changes at proteome level of *P. taiwanensis* VLB120 NADH  
487 dehydrogenase mutants in early- (A), mid- (B), and late-exponential (C) growth phase  
488 relative to the wild type. Proteins are clustered into functional categories according to  
489 the KEGG classification system (46). Each bar represents the number of proteins in the  
490 depicted category the abundance of which was either increased or decreased in  
491 response to NADH dehydrogenase deficiency. Experiments were performed in  
492 biological triplicates.

493  
494 In accordance with the physiological and transcript data, we did not observe major  
495 changes in the proteome for either NADH dehydrogenase type II single mutants ( $\Delta ndh1$ :  
496 9 of 24 proteins significantly up/downregulated,  $\Delta ndh2$ : 8 of 36 proteins significantly up-  
497 /downregulated; Figure 5, Supplementary Table S2, Supplementary File S3). Proteomic  
498 changes in both type I mutants ( $\Delta nuo$ : 50 of 139 proteins significantly up-  
499 /downregulated,  $\Delta nuo\Delta ndh1$ : 60 of 165 proteins significantly up-/downregulated) were  
500 more significant compared to the type II single gene knockout mutants and very similar  
501 to each other (Figure 5). The double deletion mutant  $\Delta\Delta ndh$  showed more alterations in

502 the proteome in the early- and late-exponential phase (17 and 37 of 107 proteins  
503 significantly up-/downregulated) than in the mid-exponential phase (2 significantly up-  
504 /downregulated proteins) (Figure 5 and Supplementary Table S2).

505 In the following paragraphs we are focusing on changes observed the  $\Delta\Delta ndh$  mutant for  
506 proteins related to carbon uptake, energy generation, and oxidative stress response and  
507 highlight particular differences to the type 1 NADH dehydrogenase mutants.

508 The OprB-I porin (PVLB\_20075), a carbohydrate selective porin, and the D-gluconate  
509 transporter GntT (PVLB\_13665) located in the outer and inner membrane, respectively,  
510 were higher increased in the  $\Delta\Delta ndh$  mutant during the early- and late-exponential  
511 growth phase, while the glucokinase quantity was strongly reduced in all growth phases.  
512 These data suggest that  $\Delta\Delta ndh$  oxidized glucose via glucose dehydrogenase (Gcd) to  
513 gluconate to a greater extent than the wild type. In contrast, the quantity of OprB-I in the  
514 type I NADH dehydrogenase mutants during the later growth phase was decreased.  
515 This might, however, be explained by the faster glucose depletion in these mutants  
516 (Figure 1).

517 During the late-exponential growth of the  $\Delta\Delta ndh$  mutant, all enzymes of the arginine  
518 deiminase (ADI) pathway were more strongly expressed while they were significantly  
519 downregulated in the NADH dehydrogenase type I mutants (Table 6). This pathway  
520 catalyzes a three-step conversion of arginine to ornithine, ammonium, and carbon  
521 dioxide coupled to ATP generation (47). Likewise, the isocitrate lyase (AceA), the first  
522 enzyme of the glyoxylate shunt, was upregulated in the  $\Delta\Delta ndh$  mutant but  
523 downregulated in the  $\Delta nuo$  mutant, which rather showed a slight upregulation of the 2-  
524 oxoglutarate dehydrogenase complex of the TCA cycle during mid- and late-exponential  
525 growth. These changes indicate that the mutant  $\Delta\Delta ndh$  used the glyoxylate shunt and  
526 not exclusively the TCA cycle in the late-exponential growth phase.

527 We further observed remarkable changes of proteins combating oxidative stress. While  
528 deletion of the *nuo* operon ( $\Delta nuo$  and  $\Delta nuo\Delta ndh1$ ) resulted in a generally reduced



529 abundance of proteins involved in the oxidative stress response, those mutants deficient  
530 in one of the two type II dehydrogenases displayed increased levels of peroxidases and  
531 peroxiredoxin proteins. The abundance of the catalase-peroxidase KatG was extremely  
532 decreased in both type I mutants whereas it was weakly increased in the  $\Delta\Delta ndh$  mutant.  
533 Additionally, the peroxidase encoded by PP\_0235 and the quinone reductase ChrR  
534 were only higher expressed in the  $\Delta\Delta ndh$  mutant with the latter being reported to be  
535 induced by superoxide (48) while peroxiredoxin AhpC was weakly upregulated in the  
536 single gene deletion mutants,  $\Delta ndh1$  and  $\Delta ndh2$  (Supplementary File S3). These  
537 findings indicate that the deletion of the *nuo* complex reduces oxidative stress while it is  
538 increased in the mutants deficient in type I dehydrogenase.

539

540 **Table 5.** Protein abundance in NADH dehydrogenase mutants in comparison to the wild  
 541 type. Proteins marked with a diamond (◊) are discussed in the text.

| Gene name                                                     | Gene function or product <sup>a</sup> | $\Delta\Delta ndh$ |      |      | $\Delta nuo$ |      |      | $\Delta nuo\Delta ndh1$ |      |      |
|---------------------------------------------------------------|---------------------------------------|--------------------|------|------|--------------|------|------|-------------------------|------|------|
|                                                               |                                       | early              | mid  | late | early        | mid  | late | early                   | mid  | Late |
| <b>Log2 fold change relative to the wild type<sup>b</sup></b> |                                       |                    |      |      |              |      |      |                         |      |      |
| <b>Carbohydrate metabolism</b>                                |                                       |                    |      |      |              |      |      |                         |      |      |
| Pgk                                                           | Phosphoglycerate kinase               |                    |      |      |              |      |      |                         |      |      |
| SucC                                                          | Succinate-CoA ligase, subunit beta    |                    |      |      | 0.3          | 0.3  | 0.5  | 0.4                     | 0.4  | 0.5  |
| SucD                                                          | Succinate-CoA ligase, subunit alpha   |                    |      |      |              | 0.4  | 1.0  | 0.6                     | 0.8  | 1.0  |
| SdhB                                                          | Succinate dehydrogenase               |                    |      |      |              |      | 0.8  | 0.5                     | 0.5  | 0.8  |
| ◊ Glk                                                         | Glucokinase                           | -3.1               | -2.8 | -2.5 |              |      |      |                         |      |      |
| TktA                                                          | Transketolase                         |                    |      | -1.5 |              |      |      |                         |      |      |
| ◊ AceA                                                        | Isocitrate lyase                      |                    |      | 0.8  |              |      | -1.3 |                         |      |      |
| Ppc                                                           | Phosphoenolpyruvate carboxylase       |                    |      |      |              | 1.35 |      |                         |      |      |
| Idh                                                           | Isocitrate dehydrogenase              |                    |      |      |              |      | 0.6  |                         | 0.5  | -2.6 |
| ◊ Gcd                                                         | Quinoprotein glucose dehydrogenase    |                    |      |      |              |      | 2.2  |                         |      |      |
| <b>Energy metabolism</b>                                      |                                       |                    |      |      |              |      |      |                         |      |      |
| TsaA                                                          | Putative peroxiredoxin                |                    |      |      |              | 0.5  | 0.7  | 0.5                     | 0.48 | 0.79 |
| Fpr-I                                                         | Ferredoxin-NADP(+) reductase          | -1.0               |      | -1.1 |              |      |      | -3.1                    | -1.7 |      |
| ◊ PP_0235                                                     | Peroxidase                            |                    |      | 3.2  |              |      |      |                         |      |      |
| ◊ ChrR                                                        | Quinone reductase                     |                    |      | 2.0  |              |      |      |                         |      |      |
| <b>Amino acid metabolism</b>                                  |                                       |                    |      |      |              |      |      |                         |      |      |
| ◊ ArcA                                                        | Arginine deiminase                    |                    |      | 1.1  |              |      | -1.9 |                         |      | -1.9 |
| ◊ ArcB                                                        | Ornithine carbamoyltransferase        |                    |      | 1.2  |              |      | -2.3 |                         |      | -2.3 |
| ◊ ArcC                                                        | Carbamate kinase                      |                    |      | 0.8  | -0.6         |      | -2.0 |                         |      | -1.5 |
| <b>Transporter/Carbon uptake</b>                              |                                       |                    |      |      |              |      |      |                         |      |      |
| ◊ OprB-I                                                      | Porin                                 | 1.4                |      | 1.4  |              |      | -2.5 |                         | -2.0 | -2.8 |
| ◊ GntT                                                        | D-gluconate transporter               | 0.6                |      | 1.2  |              |      |      | 0.9                     |      |      |
| GtsA                                                          | Mannose/glucose ABC transporter       | 0.8                |      |      | 0.9          | 0.8  |      | 1.0                     | 0.7  |      |
| GtsD                                                          | Mannose/glucose ABC transporter       | 0.7                |      |      |              |      |      |                         |      |      |
| <b>Stress proteins</b>                                        |                                       |                    |      |      |              |      |      |                         |      |      |
| ◊ KatG                                                        | Catalase-peroxidase                   |                    |      | 0.7  |              |      | -2.3 |                         |      | -2.8 |
| TauA                                                          | Taurine ABC transporter               |                    |      | 2.4  |              |      |      |                         |      |      |
| DnaK                                                          | Chaperone protein                     |                    |      | -0.3 |              |      |      |                         |      |      |
| TrxA                                                          | Thioredoxin                           | 0.9                |      | 0.6  |              |      |      |                         |      |      |

Color key<sup>542</sup>

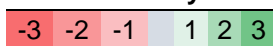

Fold change<sup>544</sup>

<sup>a</sup> Gene function assignment differs from Figure 5

545 <sup>b</sup> Numbers indicate fold change for upregulated (+) and down regulated (-) proteins  
546 relative to the wild type, and the lack of a number indicates no differential production.

## 547 **Discussion**

548 The presented in-depth analysis of NADH dehydrogenase mutants revealed a high  
549 metabolic robustness of *P. taiwanensis* VLB120 to partial loss of the three NADH  
550 dehydrogenases, but also the essentiality of residual NADH dehydrogenase activity, as  
551 the simultaneous deficiency of Nuo and Ndh2 was lethal likely due to inefficient NADH  
552 oxidation or ATP provision.

553 In accordance with the observed phenotypic robustness, NADH oxidation activities in  
554 the mutant strains were not reduced. While this can be explained for those mutants  
555 deficient in the *nuc* operon with a significant upregulation of *ndh2*, no transcriptional  
556 changes of NADH dehydrogenase related genes were observed for the other mutants.  
557 In contrast the mutant with Nuo as the sole NADH dehydrogenase ( $\Delta\Delta ndh$ ) showed a  
558 growth phenotype upon mid-exponential growth phase, accompanied by various  
559 metabolic changes summarized in Figure 6. The wild type like growth of the  $\Delta\Delta ndh$   
560 mutant on glucose is likely sustained by switching from glucose phosphorylation to  
561 direct oxidation in order to partially uncouple the oxidation of the carbon source from  
562 NADH formation.

563 *In vitro* studies have shown the formation of reactive oxygen species (ROS) such as  
564 superoxide ( $O_2^{\cdot-}$ ) and hydrogen peroxide ( $H_2O_2$ ) by enzymes of the electron transport  
565 chain due to electron leakage to oxygen. Nuo (complex I) and cytochrome bc1 (complex  
566 III) are considered the main sites for ROS in mitochondria and *P. fluorescens* (49, 50)  
567 but rather the type 2 dehydrogenase in, e.g., *E. coli* (51). It has further been reported  
568 that an oversupply of NADH can enhance ROS production (52, 53), which activates the  
569 cellular antioxidant defense system and can lead to cell death (49, 54). Due to a  
570 relatively high NADH/NAD<sup>+</sup> ratio in the mid-exponential growth phase,  $\Delta\Delta ndh$  might  
571 have been faced with higher ROS production than the wild type. This hypothesis is

572 supported by the RAMOS data (Figure 2), which indicated product inhibition after six  
573 hours potentially caused by high NADH levels or oxidative stress. In line with this  
574 hypothesis, it has been shown that *M. tuberculosis* NADH dehydrogenase mutants with  
575 a similarly elevated NADH/NAD<sup>+</sup> ratio were more susceptible to (additional) oxidative  
576 stress than those with a lower NADH/NAD<sup>+</sup> ratio (55). Increased ROS production due to  
577 an increased NADH/NAD<sup>+</sup> ratio could be one reason for the strongly reduced growth  
578 rate in the later growth stages and the trigger for metabolic rerouting in  $\Delta\Delta ndh$  (Figure  
579 6).

580 The activation of the glyoxylate shunt as indicated by the proteome data might further  
581 contribute to stress reduction in two ways. Firstly, this shortcut of the TCA cycle  
582 bypasses NADH-producing steps, effectively attenuating NADH generation (56-58).  
583 Secondly, the glyoxylate formed by the isocitrate lyase AceA activity of this pathway,  
584 upregulated in  $\Delta\Delta ndh$ , might react with hydrogen peroxide to produce formate and CO<sub>2</sub>  
585 (56, 59). This ROS combating strategy was also reported in *Pseudomonas aeruginosa*,  
586 *Burkholderia cenocepacia*, and *Staphylococcus aureus*, even though *S. aureus* has no  
587 functional glyoxylate shunt (56, 60-62). Note, however, that neither higher formate  
588 dehydrogenase abundance nor formate accumulation was observed.

589 ROS production seems to be not elevated in the *nuo* mutants with supposedly higher  
590 Ndh2 activity because our data showed no activation of any of these mechanisms. The  
591 same was suggested for corresponding *M. tuberculosis* mutants (55).

592 A probable energy shortage due to reduced respiratory activity might have been  
593 counteracted in  $\Delta\Delta ndh$  by activation of the ADI pathway as an alternative ATP source.  
594 This pathway generates 1 mol ATP per mol arginine (47, 63) and was described in *P.*  
595 *aeruginosa* to provide ATP under oxygen limiting conditions (47). We exclude oxygen  
596 limitation as an inducer of the ADI pathway in *P. taiwanensis* VLB120 under the  
597 conditions tested here since the pathway was only expressed in the  $\Delta\Delta ndh$  mutant,  
598 although all analyzed strains were grown under the same conditions and had similar

599 oxygen uptake rates. Rather, energy depletion might have activated the ADI pathway in  
 600  $\Delta\Delta ndh$  on gluconate as described in lactic bacteria (64) or other *Pseudomonas* strains  
 601 (65), e.g., in *P. putida* DOT-T1E under energy-demanding solvent stress conditions (66,  
 602 67).

603 In this study, we showed a high metabolic flexibility of *P. taiwanensis* VLB120 to  
 604 interventions in the redox metabolism, which confers robust phenotypic behavior by  
 605 rerouting of metabolic fluxes. This metabolic adaptability and phenotypic robustness can  
 606 be advantageous for biocatalysis but simultaneously be challenging because it impedes  
 607 the prediction of mutant behavior and can lever out metabolic engineering efforts.  
 608 Hence, to effectively turn this promising microbe into a controllable, biotechnological  
 609 workhorse, further systems biological and physiological analyses are needed.

610

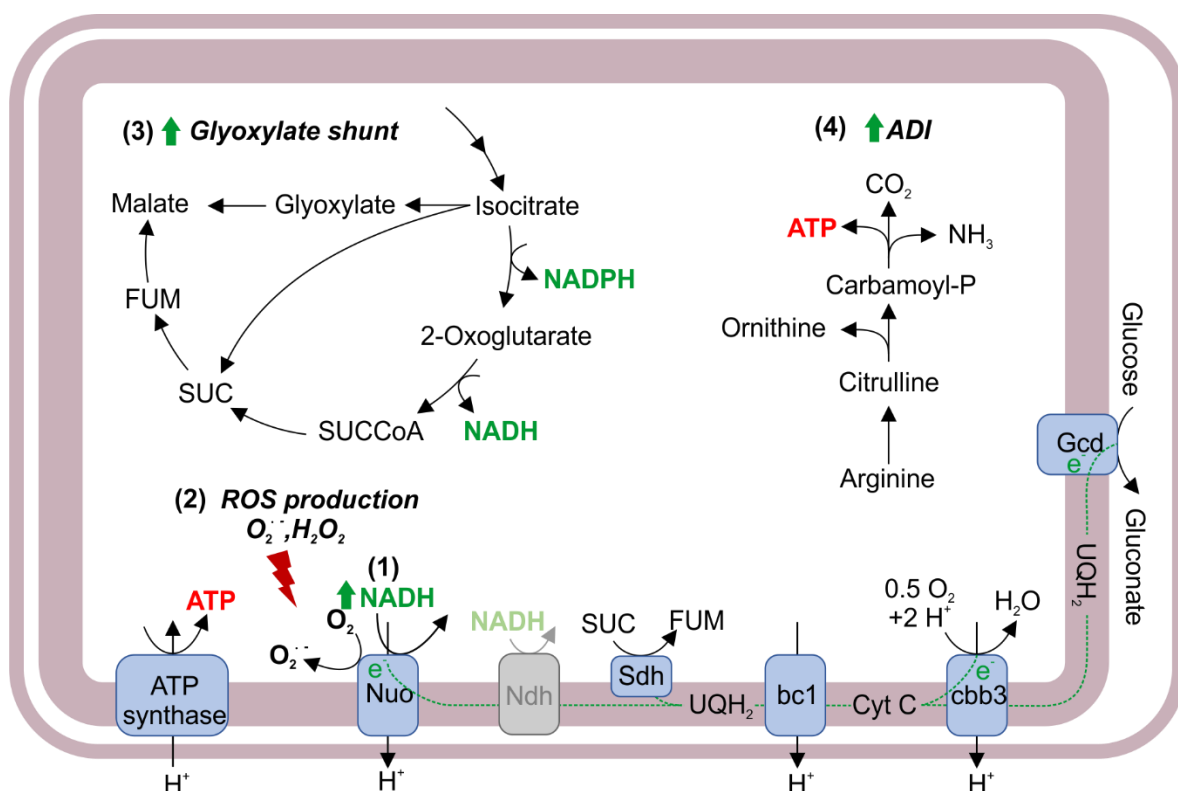

611

612 **Figure 6.** Putative rerouting of the carbon flux caused by type II NADH dehydrogenase  
 613 deficiency in *P. taiwanensis* VLB120. An increased NADH/NAD<sup>+</sup> ratio (1) triggers ROS  
 614 production (2) by NADH dehydrogenase Nuo activity (52, 53). The corresponding cell  
 615 response to oxidative stress is rerouting the carbon flux through the TCA cycle into the  
 616 glyoxylate shunt (3) to reduce NADH formation (56-58) and scavenging of reactive  
 617 oxygen species by glyoxylate (56, 59). Limited ATP provision from oxidative

618 phosphorylation might be mitigated by upregulation of the ADI pathway **(4)** (65, 66). The  
619 light representation of the Ndh dehydrogenase indicates deficiency of both isozymes.  
620 ETC, electron transport chain; ROS, reactive oxygen species; ADI, arginine deiminase  
621 pathway; Nuo, type I NADH dehydrogenase; Ndh, type II NADH dehydrogenase; Sdh,  
622 succinate dehydrogenase; bc1, cytochrome bc1 (complex III); cbb3, cytochrome cbb3  
623 (complex IV); QH<sub>2</sub>, ubiquinol; Q, ubiquinone; SUC, succinate, SUCCoA, succinyl-CoA;  
624 FUM, fumarate.

625

## 626 **Acknowledgement**

627 This study has been conducted within the ERA SynBio project SynPath (Grant ID  
628 031A459) with financial support of the German Federal Ministry of Education and  
629 Research and is part of the Joint BioEnergy Institute, supported by the Office of  
630 Science, Office of Basic Energy Sciences and Office of Biological and Environmental  
631 Research of the U.S. Department of Energy under Contract No. DE-AC02-05CH11231.  
632 BEE and SCN acknowledge financial support by the German Academic Exchange  
633 Service (DAAD) through the thematic network Aachen-California Network of Academic  
634 Exchange (ACalNet) funded by the German Federal Ministry of Education and  
635 Research (BMBF). LMB acknowledges funding by the Cluster of Excellence "The Fuel  
636 Science Center - Adaptive Conversion Systems for Renewable Energy and Carbon  
637 Sources" (EXC 2186), which is funded by the Excellence Initiative of the German  
638 federal and state governments to promote science and research at German universities.  
639 We thank Stephani Baum and Uwe Conrath for sharing lab equipment and for technical  
640 support. We are grateful to Itay Budin for discussions and instruction on the membrane  
641 isolation and *in vitro* assays and Sophia Nölting for support with qPCR measurements.  
642 We thank Benedikt Wynands and Nick Wierckx for sharing the strain *P. taiwanensis*  
643 VLB120 pSTY<sup>-</sup> and Victor de Lorenzo (Centro Nacional de Biotecnología - CNB,  
644 Madrid) for providing plasmid pEMG.

645



## 646 References

- 647 1. Kracke F, Kromer JO. 2014. Identifying target processes for microbial  
648 electrosynthesis by elementary mode analysis. *BMC Bioinformatics* 15:410.
- 649 2. Köhler KA, Blank LM, Frick O, Schmid A. 2015. D-Xylose assimilation via the  
650 Weimberg pathway by solvent-tolerant *Pseudomonas taiwanensis* VLB120.  
651 *Environ Microbiol* 17:156-170.
- 652 3. Becker J, Lange A, Fabarius J, Wittmann C. 2015. Top value platform chemicals:  
653 bio-based production of organic acids. *Curr Opin Biotechnol* 36:168-175.
- 654 4. Yim H, Haselbeck R, Niu W, Pujol-Baxley C, Burgard A, Boldt J, Khandurina J,  
655 Trawick JD, Osterhout RE, Stephen R, Estadilla J, Teisan S, Schreyer HB,  
656 Andrae S, Yang TH, Lee SY, Burk MJ, Van Dien S. 2011. Metabolic engineering  
657 of *Escherichia coli* for direct production of 1,4-butanediol. *Nat Chem Biol* 7:445.
- 658 5. Nakamura CE, Whited GM. 2003. Metabolic engineering for the microbial  
659 production of 1,3-propanediol. *Curr Opin Biotechnol* 14:454-459.
- 660 6. Takeno S, Murata R, Kobayashi R, Mitsuhashi S, Ikeda M. 2010. Engineering of  
661 *Corynebacterium glutamicum* with an NADPH-generating glycolytic pathway for  
662 L-lysine production. *Appl Environ Microbiol* 76:7154-7160.
- 663 7. Fasan R, Crook NC, Peters MW, Meinhold P, Buelter T, Landwehr M, Cirino PC,  
664 Arnold FH. 2011. Improved product-per-glucose yields in P450-dependent  
665 propane biotransformations using engineered *Escherichia coli*. *Biotechnol Bioeng*  
666 108:500-510.
- 667 8. Becker J, Zelder O, Hafner S, Schroder H, Wittmann C. 2011. From zero to hero-  
668 -design-based systems metabolic engineering of *Corynebacterium glutamicum*  
669 for L-lysine production. *Metab Eng* 13:159-168.
- 670 9. Berríos-Rivera SJ, Bennett GN, San K-Y. 2002. Metabolic Engineering of  
671 *Escherichia coli*: increase of NADH availability by overexpressing an NAD<sup>+</sup>-  
672 dependent formate dehydrogenase. *Metab Eng* 4:217-229.
- 673 10. Jain R, Huang J, Yuan Q, Yan Y. 2015. Engineering microaerobic metabolism of  
674 *E. coli* for 1,2-propanediol production. *J Ind Microbiol Biotechnol* 42:1049-1055.
- 675 11. Blank LM, Ebert BE, Buhler B, Schmid A. 2008. Metabolic capacity estimation of  
676 *Escherichia coli* as a platform for redox biocatalysis: constraint-based modeling  
677 and experimental verification. *Biotechnol Bioeng* 100:1050-1065.
- 678 12. Blank LM, Ionidis G, Ebert BE, Bühler B, Schmid A. 2008. Metabolic response of  
679 *Pseudomonas putida* during redox biocatalysis in the presence of a second  
680 octanol phase. *FEBS J* 275:5173-5190.
- 681 13. Julsing MK, Kuhn D, Schmid A, Bühler B. 2012. Resting cells of recombinant *E.*  
682 *coli* show high epoxidation yields on energy source and high sensitivity to product  
683 inhibition. *Biotechnol Bioeng* 109:1109-1119.
- 684 14. Ebert BE, Kurth F, Grund M, Blank LM, Schmid A. 2011. Response of  
685 *Pseudomonas putida* KT2440 to increased NADH and ATP demand. *Appl*  
686 *Environ Microbiol* 77:6597-6605.
- 687 15. Rühl J, Schmid A, Blank LM. 2009. Selected *Pseudomonas putida* strains able to  
688 grow in the presence of high butanol concentrations. *Appl Environ Microbiol*  
689 75:4653-4656.
- 690 16. Wynands B, Lenzen C, Otto M, Koch F, Blank LM, Wierckx N. 2018. Metabolic  
691 engineering of *Pseudomonas taiwanensis* VLB120 with minimal genomic  
692 modifications for high-yield phenol production. *Metab Eng* 47:121-133.
- 693 17. Wierckx NJP, Ballerstedt H, Bont JaMD, Wery J. 2005. Engineering of solvent-  
694 tolerant *Pseudomonas putida* S12 for bioproduction of phenol from glucose. *Appl*  
695 *Environ Microbiol* 71:8221-8227.

- 696 18. Tiso T, Sabelhaus P, Behrens B, Wittgens A, Rosenau F, Hayen H, Blank LM.  
697 2016. Creating metabolic demand as an engineering strategy in *Pseudomonas*  
698 *putida* – rhamnolipid synthesis as an example. *Metab Eng Commun* 3:234-244.
- 699 19. Dong J, Chen Y, Benites VT, Baidoo EEK, Petzold CJ, Beller HR, Eudes A,  
700 Scheller HV, Adams PD, Mukhopadhyay A, Simmons BA, Singer SW. 2019.  
701 Methyl ketone production by *Pseudomonas putida* is enhanced by plant-derived  
702 amino acids. *Biotechnol Bioeng* doi:10.1002/bit.26995.
- 703 20. Park JB, Buhler B, Panke S, Witholt B, Schmid A. 2007. Carbon metabolism and  
704 product inhibition determine the epoxidation efficiency of solvent-tolerant  
705 *Pseudomonas sp.* strain VLB120ΔC. *Biotechnol Bioeng* 98:1219-1229.
- 706 21. Foster JW, Park YK, Penfound T, Fenger T, Spector MP. 1990. Regulation of  
707 NAD metabolism in *Salmonella typhimurium*: molecular sequence analysis of the  
708 bifunctional *nadR* regulator and the *nadA-pnuC* operon. *J Bacteriol* 172:4187-  
709 4196.
- 710 22. Spehr V, Schlitt A, Scheide D, Guénebaut V, Friedrich T. 1999. Overexpression  
711 of the *Escherichia coli nuo*-operon and isolation of the overproduced  
712 NADH:ubiquinone oxidoreductase (complex I). *Biochemistry* 38:16261-16267.
- 713 23. Pruss BM, Nelms JM, Park C, Wolfe AJ. 1994. Mutations in NADH:ubiquinone  
714 oxidoreductase of *Escherichia coli* affect growth on mixed amino acids. *J*  
715 *Bacteriol* 176:2143-2150.
- 716 24. Matsushita K, Ohnishi T, Kaback HR. 1987. NADH-ubiquinone oxidoreductases  
717 of the *Escherichia coli* aerobic respiratory chain. *Biochemistry* 26:7732-7737.
- 718 25. Sambrook J, E.F. Fritsch, and T. Maniatis. 1982. *Molecular Cloning: a laboratory*  
719 *manual*. Cold Spring Harbour Press.
- 720 26. Hartmans S, Smits JP, van der Werf MJ, Volkering F, de Bont JA. 1989.  
721 Metabolism of styrene oxide and 2-phenylethanol in the styrene-degrading  
722 *Xanthobacter* strain 124X. *Appl Environ Microbiol* 55:2850-2855.
- 723 27. Ditta G, Stanfield S, Corbin D, Helinski DR. 1980. Broad host range DNA cloning  
724 system for Gram-negative bacteria: construction of a gene bank of *Rhizobium*  
725 *meliloti*. *Proc Nat Acad Sci USA* 77:7347-7351.
- 726 28. Martínez-García E, de Lorenzo V. 2011. Engineering multiple genomic deletions  
727 in Gram-negative bacteria: Analysis of the multi-resistant antibiotic profile of  
728 *Pseudomonas putida* KT2440. *Environ Microbiol* 13:2702-2716.
- 729 29. Panke S, Witholt B, Schmid A, Wubbolts MG. 1998. Towards a biocatalyst for  
730 (S)-styrene oxide production: characterization of the styrene degradation  
731 pathway of *Pseudomonas sp.* strain VLB120. *Appl Environ Microbiol* 64:2032-  
732 2043.
- 733 30. Choi KH, Kumar A, Schweizer HP. 2006. A 10-min method for preparation of  
734 highly electrocompetent *Pseudomonas aeruginosa* cells: application for DNA  
735 fragment transfer between chromosomes and plasmid transformation. *J Microbiol*  
736 *Methods* 64:391-397.
- 737 31. Chomczynski P, Rymaszewski M. 2006. Alkaline polyethylene glycol-based  
738 method for direct PCR from bacteria, eukaryotic tissue samples, and whole  
739 blood. *BioTechniques* 40:454, 456, 458.
- 740 32. Gonzalez Fernandez-Nino SM, Smith-Moritz AM, Chan LJ, Adams PD,  
741 Heazlewood JL, Petzold CJ. 2015. Standard flow liquid chromatography for  
742 shotgun proteomics in bioenergy research. *Front Bioeng Biotechnol* 3:44.
- 743 33. Perez-Riverol Y, Csordas A, Bai J, Bernal-Llinares M, Hewapathirana S, Kundu  
744 DJ, Inuganti A, Griss J, Mayer G, Eisenacher M, Perez E, Uszkoreit J, Pfeuffer J,  
745 Sachsenberg T, Yilmaz S, Tiwary S, Cox J, Audain E, Walzer M, Jarnuczak AF,  
746 Ternent T, Brazma A, Vizcaino JA. 2019. The PRIDE database and related tools  
747 and resources in 2019: improving support for quantification data. *Nucleic Acids*  
748 *Res* 47:D442-D450.



- 749 34. Pfaffl MW. 2001. A new mathematical model for relative quantification in real-  
750 time RT-PCR. *Nucleic Acids Res* 29:e45.
- 751 35. Borisov VB, Murali R, Verkhovskaya ML, Bloch Da, Han H, Gennis RB,  
752 Verkhovskiy MI. 2011. Aerobic respiratory chain of *Escherichia coli* is not allowed  
753 to work in fully uncoupled mode. *Proc Natl Acad Sci U S A* 108:17320-17324.
- 754 36. Schulte A, Schilling JV, Nolten J, Korona A, Krömke H, Vennekötter J-B,  
755 Schillheim B, Wessling M, Conrath U, Büchs J. 2018. Parallel online  
756 determination of ethylene release rate by Shaken Parsley cell cultures using a  
757 modified RAMOS device. *BMC Plant Biol* 18:101.
- 758 37. Anderlei T, Zang W, Papaspyrou M, Buchs J. 2004. Online respiration activity  
759 measurement (OTR, CTR, RQ) in shake flasks. *Biochem Eng J* 17:187-194.
- 760 38. McCloskey D, Utrilla J, Naviaux RK, Palsson BO, Feist AM. 2015. Fast Swinnex  
761 filtration (FSF): a fast and robust sampling and extraction method suitable for  
762 metabolomics analysis of cultures grown in complex media. *Metabolomics*  
763 11:198-209.
- 764 39. Wu L, Mashego MR, van Dam JC, Proell AM, Vinke JL, Ras C, van Winden WA,  
765 van Gulik WM, Heijnen JJ. 2005. Quantitative analysis of the microbial  
766 metabolome by isotope dilution mass spectrometry using uniformly <sup>13</sup>C-labeled  
767 cell extracts as internal standards. *Anal Biochem* 336:164-171.
- 768 40. Mashego MR, Wu L, Van Dam JC, Ras C, Vinke JL, Van Winden WA, Van Gulik  
769 WM, Heijnen JJ. 2004. MIRACLE: mass isotopomer ratio analysis of U-<sup>13</sup>C-  
770 labeled extracts. A new method for accurate quantification of changes in  
771 concentrations of intracellular metabolites. *Biotechnol Bioeng* 85:620-628.
- 772 41. Torres A, Kasturiarachi N, DuPont M, Cooper VS, Bomberger J, Zemke A. 2019.  
773 NADH dehydrogenases in *Pseudomonas aeruginosa* growth and virulence. *Front*  
774 *Microbiol* 10.
- 775 42. Köhler KAK, Rückert C, Schatschneider S, Vorhölter FJ, Szczepanowski R,  
776 Blank LM, Niehaus K, Goesmann A, Pühler A, Kalinowski J, Schmid A. 2013.  
777 Complete genome sequence of *Pseudomonas* sp. strain VLB120 a solvent  
778 tolerant, styrene degrading bacterium, isolated from forest soil. *J Biotechnol*  
779 168:729-730.
- 780 43. Vicente M, Canovas JL. 1973. Glucolysis in *Pseudomonas putida*: physiological  
781 role of alternative routes from the analysis of defective mutants. *J Bacteriol*  
782 116:908-914.
- 783 44. del Castillo T, Ramos JL, Rodriguez-Herva JJ, Fuhrer T, Sauer U, Duque E.  
784 2007. Convergent peripheral pathways catalyze initial glucose catabolism in  
785 *Pseudomonas putida*: genomic and flux analysis. *J Bacteriol* 189:5142-5152.
- 786 45. Calhoun MW, Gennis RB. 1993. Demonstration of separate genetic loci encoding  
787 distinct membrane-bound respiratory NADH dehydrogenases in *Escherichia coli*.  
788 *J Bacteriol* 175:3013-3019.
- 789 46. Kanehisa M, Sato Y, Kawashima M, Furumichi M, Tanabe M. 2016. KEGG as a  
790 reference resource for gene and protein annotation. *Nucleic Acids Res* 44:D457-  
791 462.
- 792 47. Mercenier A, Simon JP, Vander Wauven C, Haas D, Stalon V. 1980. Regulation  
793 of enzyme synthesis in the arginine deiminase pathway of *Pseudomonas*  
794 *aeruginosa*. *J Bacteriol* 144:159-163.
- 795 48. Gonzalez CF, Aekerley DF, Lynch SV, Matin A. 2005. ChrR, a soluble quinone  
796 reductase of *Pseudomonas putida* that defends against H<sub>2</sub>O<sub>2</sub>. *J Biol Chem*  
797 280:22590-22595.
- 798 49. Mailloux RJ, Lemire J, Appanna VD. 2011. Metabolic networks to combat  
799 oxidative stress in *Pseudomonas fluorescens*. *Antonie Van Leeuwenhoek*  
800 99:433-442.
- 801 50. Imlay JA. 2003. Pathways of oxidative damage. *Annu Rev Microbiol* 57:395-418.

- 802 51. Messner KR, Imlay JA. 1999. The identification of primary sites of superoxide  
803 and hydrogen peroxide formation in the aerobic respiratory chain and sulfite  
804 reductase complex of *Escherichia coli*. J Biol Chem 274:10119-10128.
- 805 52. Murphy MP. 2009. How mitochondria produce reactive oxygen species. Biochem  
806 J 417:1-13.
- 807 53. Vinogradov AD, Grivennikova VG. 2016. Oxidation of NADH and ROS production  
808 by respiratory complex I. Biochim Biophys Acta 1857:863-871.
- 809 54. Sharma LK, Lu J, Bai Y. 2009. Mitochondrial respiratory complex I: structure,  
810 function and implication in human diseases. Curr Med Chem 16:1266-1277.
- 811 55. Vilcheze C, Weinrick B, Leung LW, Jacobs WR, Jr. 2018. Plasticity of  
812 *Mycobacterium tuberculosis* NADH dehydrogenases and their role in virulence.  
813 Proc Natl Acad Sci U S A 115:1599-1604.
- 814 56. Ahn S, Jung J, Jang IA, Madsen EL, Park W. 2016. Role of glyoxylate shunt in  
815 oxidative stress response. J Biol Chem 291:11928-11938.
- 816 57. Kornberg HL. 1966. The role and control of the glyoxylate cycle in *Escherichia*  
817 *coli*. The Biochemical journal 99:1-11.
- 818 58. Lemire J, Alhasawi A, Appanna VP, Tharmalingam S, Appanna VD. 2017.  
819 Metabolic defence against oxidative stress: the road less travelled so far. J Appl  
820 Microbiol 123:798-809.
- 821 59. Thomas SC, Alhasawi A, Auger C, Omri A, Appanna VD. 2016. The role of  
822 formate in combatting oxidative stress. Antonie Van Leeuwenhoek 109:263-271.
- 823 60. Van Acker H, Sass A, Bazzini S, De Roy K, Udine C, Messiaen T, Riccardi G,  
824 Boon N, Nelis HJ, Mahenthiralingam E, Coenye T. 2013. Biofilm-grown  
825 *Burkholderia cepacia* complex cells survive antibiotic treatment by avoiding  
826 production of reactive oxygen species. PLoS One 8:e58943.
- 827 61. Somerville GA, Proctor RA. 2009. At the crossroads of bacterial metabolism and  
828 virulence factor synthesis in *Staphylococci*. Microbiol Mol Biol Rev 73:233-248.
- 829 62. Somerville GA, Said-Salim B, Wickman JM, Raffel SJ, Kreiswirth BN, Musser JM.  
830 2003. Correlation of acetate catabolism and growth yield in *Staphylococcus*  
831 *aureus*: implications for host-pathogen interactions. Infect Immun 71:4724-4732.
- 832 63. Thauer RK, Jungermann K, Decker K. 1977. Energy conservation in  
833 chemotrophic anaerobic bacteria. Bacteriol Rev 41:100-180.
- 834 64. Fernández M, Zúñiga M. 2006. Amino acid catabolic pathways of lactic acid  
835 bacteria. Crit Rev Microbiol 32:155-183.
- 836 65. Cunin R, Glansdorff N, Piérard A, Stalon V. 1986. Biosynthesis and metabolism  
837 of arginine in bacteria. Microbiol Rev 50:314-352.
- 838 66. Segura A, Godoy, P., van Dillewijn, P., Hurtado, A., Arroyo, N., Santacruz, S.,  
839 Ramos, J.-L. 2005. Proteomic analysis reveals the participation of energy- and  
840 stress-related proteins in the response of *Pseudomonas putida* DOT-T1E to  
841 toluene J Bacteriol 187:5937-5945.
- 842 67. Ramos JL, Duque E, Rodriguez-Herva JJ, Godoy P, Haidour A, Reyes F,  
843 Fernandez-Barrero A. 1997. Mechanisms for solvent tolerance in bacteria. J Biol  
844 Chem 272:3887-3890.
- 845

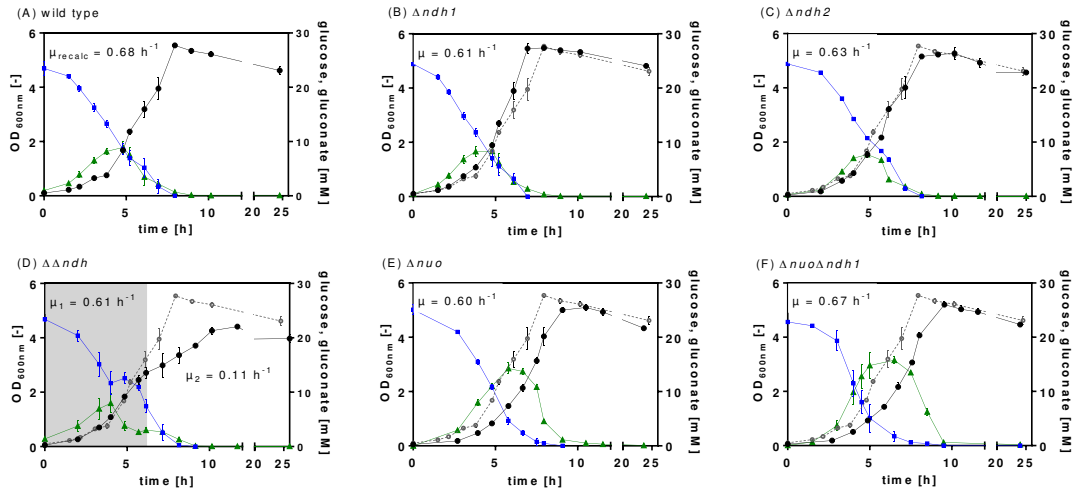

Figure 1

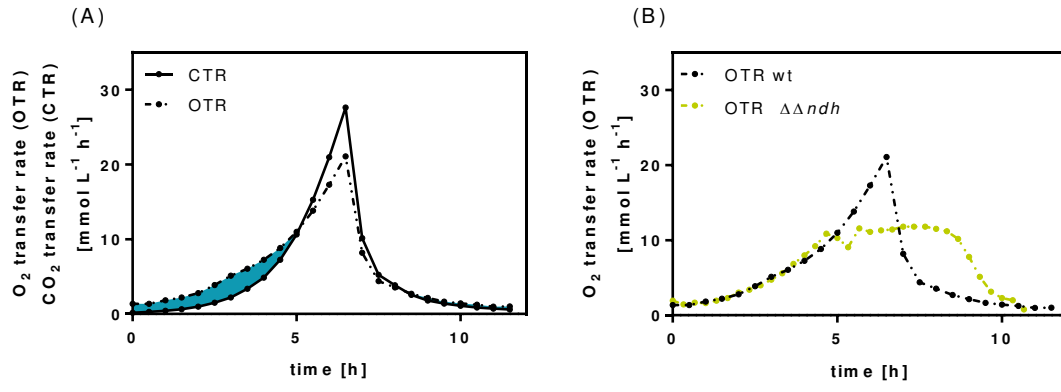

Figure 2.

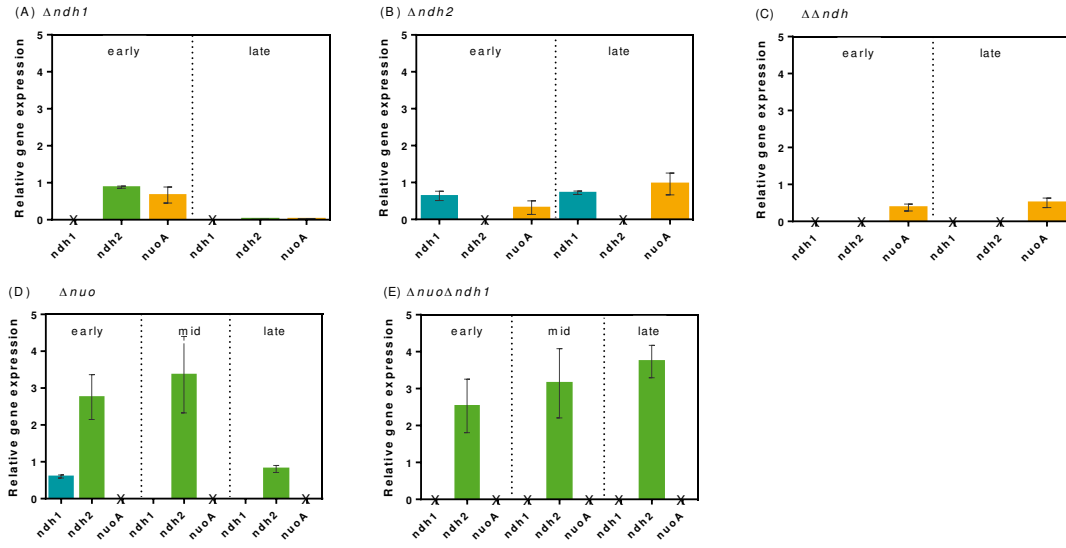

**Figure 3.**

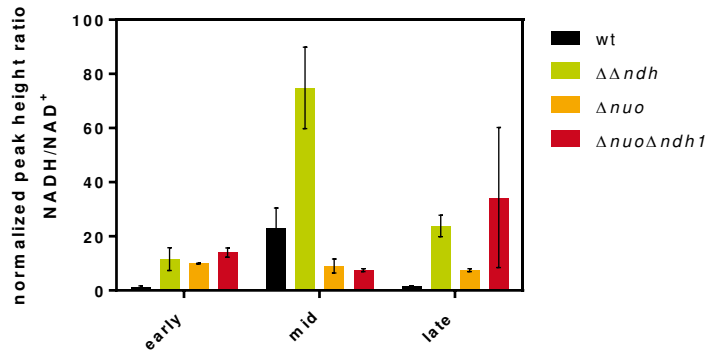

Figure 4.

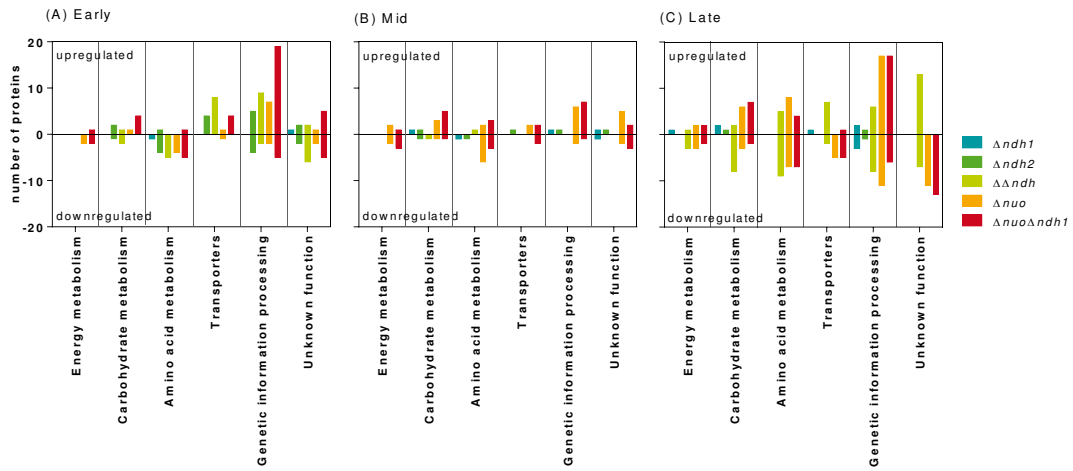

Figure 5.

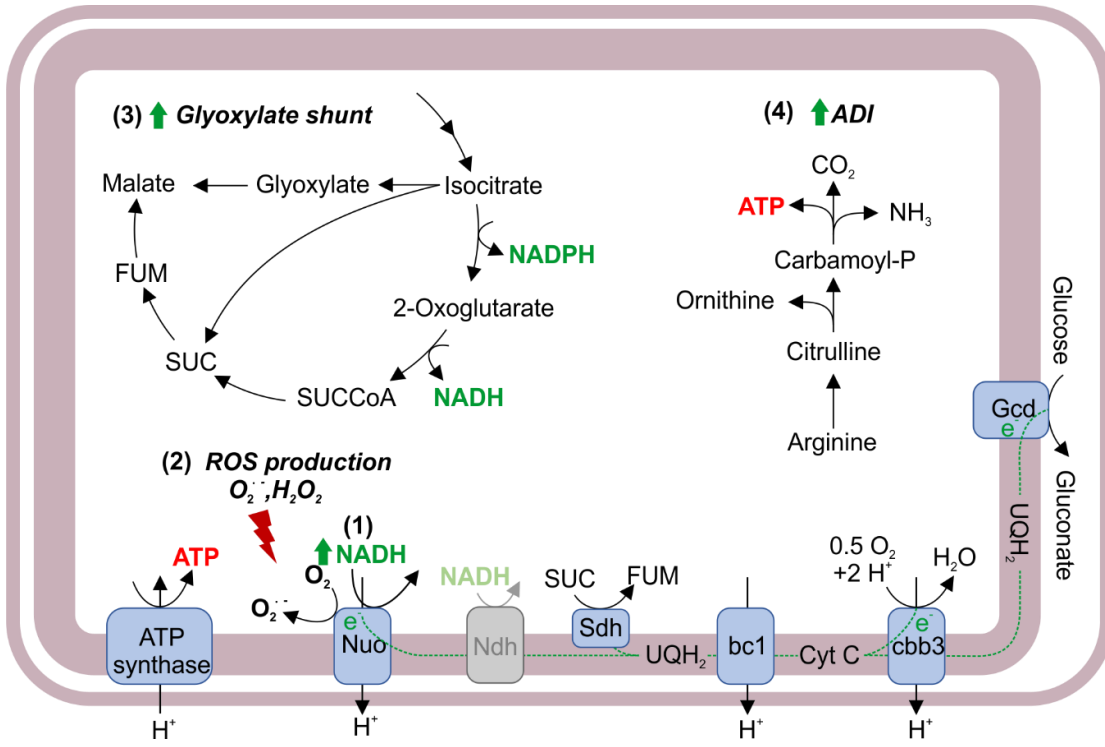

Figure 6.
